# Supplementary material
Source: publisher figshare collection journal article supplement (https://acs.figshare.com/ndownloader/files/4312267)
Supplement: Supplementary file 1 [file 4312267]

 

data_ad0801
_publ_requested_journal          Organometallics
_publ_contact_author_name        'Athanasia Dervisi'
_publ_contact_author_address     
;School of Chemistry
Cardiff University
Main Building
Park Place
Cardiff
CF10 3AT
;
_publ_contact_author_email       dervisia@cf.ac.uk
_publ_contact_author_phone       '+ 44 (0)29 20874081'
_publ_contact_author_fax         '+ 44 (0)29 20874030'
loop_
_publ_author_name
_publ_author_address
'Dervisi, Athanasia'
;School of Chemistry
Cardiff University
Main Building
Park Place
Cardiff
CF10 3AT
;
'Carcedo, Cristina'
;School of Chemistry
Cardiff University
Main Building
Park Place
Cardiff
CF10 3AT
;
'Knight, James C.'
;School of Chemistry
Cardiff University
Main Building
Park Place
Cardiff
CF10 3AT
;
'Pope, Simon J. A.'
;School of Chemistry
Cardiff University
Main Building
Park Place
Cardiff
CF10 3AT
;
'Fallis, Ian A.'
;School of Chemistry
Cardiff University
Main Building
Park Place
Cardiff
CF10 3AT
;

_audit_creation_method           SHELXL-97
_chemical_name_systematic        
;
 ?
;
_chemical_name_common            ?
_chemical_melting_point          ?
_chemical_formula_moiety         'C28 H36 Au2 N8 O4, 2(F6 P), H2 O'
_chemical_formula_sum            'C28 H38 Au2 F12 N8 O5 P2'
_chemical_formula_weight         1250.54

loop_
_atom_type_symbol
_atom_type_description
_atom_type_scat_dispersion_real
_atom_type_scat_dispersion_imag
_atom_type_scat_source
C C 0.0033 0.0016 'International Tables Vol C Tables 4.2.6.8 and 6.1.1.4'
H H 0.0000 0.0000 'International Tables Vol C Tables 4.2.6.8 and 6.1.1.4'
N N 0.0061 0.0033 'International Tables Vol C Tables 4.2.6.8 and 6.1.1.4'
O O 0.0106 0.0060 'International Tables Vol C Tables 4.2.6.8 and 6.1.1.4'
F F 0.0171 0.0103 'International Tables Vol C Tables 4.2.6.8 and 6.1.1.4'
P P 0.1023 0.0942 'International Tables Vol C Tables 4.2.6.8 and 6.1.1.4'
Au Au -2.0133 8.8022 'International Tables Vol C Tables 4.2.6.8 and 6.1.1.4'

_symmetry_cell_setting           Orthorhombic
_symmetry_space_group_name_H-M   'I 21 21 21'
_symmetry_space_group_name_Hall  'I 2b 2c'

loop_
_symmetry_equiv_pos_as_xyz
'x, y, z'
'-x, -y+1/2, z'
'x, -y, -z+1/2'
'-x+1/2, y, -z'
'x+1/2, y+1/2, z+1/2'
'-x+1/2, -y+1, z+1/2'
'x+1/2, -y+1/2, -z+1'
'-x+1, y+1/2, -z+1/2'

_cell_length_a                   13.2240(5)
_cell_length_b                   17.0310(6)
_cell_length_c                   20.7230(8)
_cell_angle_alpha                90.00
_cell_angle_beta                 90.00
_cell_angle_gamma                90.00
_cell_volume                     4667.2(3)
_cell_formula_units_Z            4
_cell_measurement_temperature    150(2)
_cell_measurement_reflns_used    27622
_cell_measurement_theta_min      2.91
_cell_measurement_theta_max      27.485
_chemical_absolute_configuration rm

_exptl_crystal_description       prism
_exptl_crystal_colour            colourless
_exptl_crystal_size_max          0.1
_exptl_crystal_size_mid          0.08
_exptl_crystal_size_min          0.08
_exptl_crystal_density_meas      ?
_exptl_crystal_density_diffrn    1.780
_exptl_crystal_density_method    'not measured'
_exptl_crystal_F_000             2392
_exptl_absorpt_coefficient_mu    6.437
_exptl_absorpt_correction_type   none
_exptl_absorpt_correction_T_min  ?
_exptl_absorpt_correction_T_max  ?
_exptl_absorpt_process_details   none

_exptl_special_details           
;
 ?
;

_diffrn_ambient_temperature      150(2)
_diffrn_radiation_wavelength     0.71073
_diffrn_radiation_type           MoK\a
_diffrn_radiation_source         'fine-focus sealed tube'
_diffrn_radiation_monochromator  graphite
_diffrn_measurement_device_type  KappaCCD
_diffrn_measurement_method       CCD
_diffrn_detector_area_resol_mean ?
_diffrn_standards_number         ?
_diffrn_standards_interval_count ?
_diffrn_standards_interval_time  ?
_diffrn_standards_decay_%        ?
_diffrn_reflns_number            8073
_diffrn_reflns_av_R_equivalents  0.0595
_diffrn_reflns_av_sigmaI/netI    0.0907
_diffrn_reflns_limit_h_min       -11
_diffrn_reflns_limit_h_max       17
_diffrn_reflns_limit_k_min       -13
_diffrn_reflns_limit_k_max       22
_diffrn_reflns_limit_l_min       -26
_diffrn_reflns_limit_l_max       26
_diffrn_reflns_theta_min         3.01
_diffrn_reflns_theta_max         27.48
_reflns_number_total             4980
_reflns_number_gt                3934
_reflns_threshold_expression     >2sigma(I)

_computing_data_collection       'Collect (Nonius BV, 1997-2000)'
_computing_cell_refinement       'HKL Scalepack (Otwinowski & Minor 1997)'
_computing_data_reduction        
'HKL Denzo and Scalepack (Otwinowski & Minor 1997)'
_computing_structure_solution    'SIR92 (Giacovazzo et al., 1993)'
_computing_structure_refinement  'SHELXL-97 (Sheldrick, 1997)'
_computing_molecular_graphics    'Ortep-3 for Windows (Farrugia, 1997)'
_computing_publication_material  'WinGX publication routines (Farrugia, 1999)'

_refine_special_details          
;
 Refinement of F^2^ against ALL reflections.  The weighted R-factor wR and
 goodness of fit S are based on F^2^, conventional R-factors R are based
 on F, with F set to zero for negative F^2^. The threshold expression of
 F^2^ > 2sigma(F^2^) is used only for calculating R-factors(gt) etc. and is
 not relevant to the choice of reflections for refinement.  R-factors based
 on F^2^ are statistically about twice as large as those based on F, and R-
 factors based on ALL data will be even larger.

The unit cell contained large regions of diffusely scattered electron 
density indicative of severely disordered solvent which could not be modelled. 
The SQUEEZE routine in PLATON (Spek, 2003) was used to remove the 
contributions of the disordered solvent from diffraction intensities in 
order to improve refinement of ordered parts within the structure.
;

_refine_ls_structure_factor_coef Fsqd
_refine_ls_matrix_type           full
_refine_ls_weighting_scheme      calc
_refine_ls_weighting_details     
'calc w=1/[\s^2^(Fo^2^)+(0.0629P)^2^+0.0000P] where P=(Fo^2^+2Fc^2^)/3'
_atom_sites_solution_primary     direct
_atom_sites_solution_secondary   difmap
_atom_sites_solution_hydrogens   geom
_refine_ls_hydrogen_treatment    constr
_refine_ls_extinction_method     none
_refine_ls_extinction_coef       ?
_refine_ls_abs_structure_details 'Flack H D (1983), Acta Cryst. A39, 876-881'
_refine_ls_abs_structure_Flack   -0.007(15)
_refine_ls_number_reflns         4980
_refine_ls_number_parameters     260
_refine_ls_number_restraints     0
_refine_ls_R_factor_all          0.0759
_refine_ls_R_factor_gt           0.0561
_refine_ls_wR_factor_ref         0.1336
_refine_ls_wR_factor_gt          0.1257
_refine_ls_goodness_of_fit_ref   1.062
_refine_ls_restrained_S_all      1.062
_refine_ls_shift/su_max          0.000
_refine_ls_shift/su_mean         0.000

loop_
_atom_site_label
_atom_site_type_symbol
_atom_site_fract_x
_atom_site_fract_y
_atom_site_fract_z
_atom_site_U_iso_or_equiv
_atom_site_adp_type
_atom_site_occupancy
_atom_site_symmetry_multiplicity
_atom_site_calc_flag
_atom_site_refinement_flags
_atom_site_disorder_assembly
_atom_site_disorder_group
C1 C 0.0629(8) 0.9795(8) 0.6552(5) 0.038(2) Uani 1 1 d . . .
C2 C -0.0877(10) 0.9281(11) 0.6846(7) 0.067(5) Uani 1 1 d . . .
H2 H -0.1374 0.8950 0.7033 0.081 Uiso 1 1 calc R . .
C3 C -0.1039(9) 0.9937(8) 0.6485(7) 0.058(4) Uani 1 1 d . . .
H3 H -0.1678 1.0151 0.6372 0.070 Uiso 1 1 calc R . .
C4 C 0.0677(12) 0.8528(10) 0.7214(7) 0.065(4) Uani 1 1 d . . .
H4A H 0.0273 0.8353 0.7584 0.097 Uiso 1 1 calc R . .
H4B H 0.1343 0.8701 0.7365 0.097 Uiso 1 1 calc R . .
H4C H 0.0760 0.8091 0.6910 0.097 Uiso 1 1 calc R . .
C5 C -0.0067(9) 1.0920(7) 0.5896(6) 0.039(3) Uani 1 1 d . . .
H5 H -0.0630 1.1291 0.6001 0.047 Uiso 1 1 calc R . .
C6 C 0.0963(9) 1.1348(8) 0.5923(5) 0.040(3) Uani 1 1 d . . .
H6A H 0.0876 1.1915 0.5834 0.048 Uiso 1 1 calc R . .
H6B H 0.1278 1.1286 0.6353 0.048 Uiso 1 1 calc R . .
C7 C 0.0988(8) 1.0539(8) 0.4995(5) 0.035(3) Uani 1 1 d . . .
H7 H 0.1170 0.9969 0.5006 0.042 Uiso 1 1 calc R . .
C8 C -0.0112(8) 1.0684(8) 0.5201(5) 0.036(3) Uani 1 1 d . . .
H8 H -0.0547 1.0210 0.5133 0.043 Uiso 1 1 calc R . .
C9 C 0.1052(9) 1.0878(7) 0.4315(5) 0.034(3) Uani 1 1 d . . .
H9 H 0.1758 1.1045 0.4209 0.041 Uiso 1 1 calc R . .
C10 C 0.0361(8) 1.1576(7) 0.4367(5) 0.034(3) Uani 1 1 d . . .
H10A H 0.0732 1.2037 0.4536 0.041 Uiso 1 1 calc R . .
H10B H 0.0075 1.1711 0.3940 0.041 Uiso 1 1 calc R . .
C11 C 0.1327(7) 0.9819(8) 0.3507(5) 0.037(2) Uani 1 1 d . . .
C12 C -0.0325(9) 0.9552(9) 0.3261(6) 0.052(4) Uani 1 1 d . . .
H12 H -0.0902 0.9313 0.3072 0.063 Uiso 1 1 calc R . .
C13 C -0.0316(8) 1.0168(9) 0.3713(5) 0.040(3) Uani 1 1 d . . .
H13 H -0.0888 1.0430 0.3890 0.048 Uiso 1 1 calc R . .
C14 C 0.0994(11) 0.8723(10) 0.2733(7) 0.065(5) Uani 1 1 d . . .
H14A H 0.1515 0.8911 0.2434 0.097 Uiso 1 1 calc R . .
H14B H 0.0413 0.8528 0.2487 0.097 Uiso 1 1 calc R . .
H14C H 0.1270 0.8297 0.2998 0.097 Uiso 1 1 calc R . .
N1 N 0.0149(8) 0.9198(6) 0.6883(5) 0.045(3) Uani 1 1 d . . .
N2 N -0.0111(6) 1.0233(7) 0.6314(4) 0.038(2) Uani 1 1 d . . .
N3 N 0.0679(6) 1.0317(6) 0.3849(4) 0.032(2) Uani 1 1 d . . .
N4 N 0.0671(7) 0.9369(7) 0.3151(5) 0.044(3) Uani 1 1 d . . .
O1 O 0.1576(5) 1.0992(4) 0.5437(3) 0.0352(17) Uani 1 1 d . . .
O2 O -0.0437(6) 1.1345(5) 0.4810(3) 0.039(2) Uani 1 1 d . . .
O3 O -0.2500 1.0790(11) 0.5000 0.086(5) Uani 1 2 d S . .
H3A H -0.2657 1.1047 0.5346 0.129 Uiso 1 1 d . . .
F1 F -0.3926(5) 1.2017(5) 0.7021(4) 0.059(2) Uani 1 1 d . . .
F2 F -0.2618(6) 1.2172(5) 0.7703(3) 0.059(2) Uani 1 1 d . . .
F3 F -0.1528(5) 1.1900(5) 0.6900(4) 0.0548(19) Uani 1 1 d . . .
F4 F -0.2849(7) 1.1729(6) 0.6215(4) 0.083(3) Uani 1 1 d . . .
F5 F -0.2703(6) 1.2870(4) 0.6779(3) 0.0559(19) Uani 1 1 d . . .
F6 F -0.2758(7) 1.1050(4) 0.7139(5) 0.077(3) Uani 1 1 d . . .
P1 P -0.2740(2) 1.19615(18) 0.69503(14) 0.0351(7) Uani 1 1 d . . .
Au1 Au 0.21739(3) 0.98185(3) 0.65041(2) 0.03823(15) Uani 1 1 d . . .

loop_
_atom_site_aniso_label
_atom_site_aniso_U_11
_atom_site_aniso_U_22
_atom_site_aniso_U_33
_atom_site_aniso_U_23
_atom_site_aniso_U_13
_atom_site_aniso_U_12
C1 0.029(5) 0.047(6) 0.036(5) -0.001(9) 0.003(5) -0.006(6)
C2 0.034(7) 0.082(12) 0.086(10) 0.025(9) 0.012(7) -0.009(8)
C3 0.028(6) 0.051(9) 0.096(10) 0.025(9) 0.034(7) -0.003(6)
C4 0.063(9) 0.064(11) 0.067(9) 0.034(8) 0.005(7) -0.012(9)
C5 0.029(6) 0.030(6) 0.057(7) -0.004(6) 0.007(6) 0.006(5)
C6 0.038(6) 0.045(7) 0.038(6) 0.001(6) 0.005(5) 0.001(6)
C7 0.028(5) 0.038(6) 0.039(5) -0.003(6) -0.002(4) 0.015(6)
C8 0.023(6) 0.038(7) 0.047(6) 0.008(5) -0.002(5) 0.002(5)
C9 0.028(6) 0.035(6) 0.039(6) -0.015(5) 0.002(5) 0.007(5)
C10 0.034(6) 0.026(6) 0.042(6) 0.005(5) 0.001(5) 0.015(5)
C11 0.035(6) 0.035(6) 0.042(5) -0.018(9) -0.007(5) 0.011(6)
C12 0.024(6) 0.064(10) 0.069(8) -0.036(8) -0.015(6) 0.000(6)
C13 0.020(5) 0.048(7) 0.053(6) -0.013(7) 0.002(4) 0.003(6)
C14 0.049(8) 0.069(11) 0.077(10) -0.053(9) -0.007(7) 0.009(8)
N1 0.037(6) 0.034(6) 0.064(6) 0.007(5) 0.007(5) -0.006(5)
N2 0.019(4) 0.042(6) 0.054(5) 0.008(5) 0.006(4) 0.001(5)
N3 0.022(4) 0.036(6) 0.038(4) -0.012(4) -0.004(4) 0.005(4)
N4 0.031(5) 0.041(6) 0.061(6) -0.035(5) -0.005(5) -0.002(5)
O1 0.026(4) 0.041(5) 0.039(4) -0.008(4) -0.001(3) -0.005(4)
O2 0.031(4) 0.039(5) 0.047(4) 0.002(4) -0.006(4) 0.016(4)
O3 0.055(9) 0.085(12) 0.117(12) 0.000 0.029(8) 0.000
F1 0.019(3) 0.067(5) 0.092(5) -0.005(5) -0.006(4) 0.000(4)
F2 0.065(5) 0.070(6) 0.043(4) 0.008(3) -0.002(3) 0.022(4)
F3 0.030(4) 0.056(5) 0.079(5) -0.012(4) -0.001(4) 0.002(4)
F4 0.073(5) 0.121(8) 0.056(4) -0.039(5) -0.007(5) 0.010(7)
F5 0.053(4) 0.037(4) 0.078(5) 0.014(3) 0.016(4) 0.009(4)
F6 0.048(4) 0.029(4) 0.152(8) 0.005(5) -0.001(5) 0.001(4)
P1 0.0245(14) 0.0356(16) 0.0451(15) -0.0056(12) -0.0023(15) 0.0013(15)
Au1 0.0265(2) 0.0398(2) 0.0485(2) 0.0140(2) -0.0022(2) -0.0068(2)

_geom_special_details            
;
 All esds (except the esd in the dihedral angle between two l.s. planes)
 are estimated using the full covariance matrix.  The cell esds are taken
 into account individually in the estimation of esds in distances, angles
 and torsion angles; correlations between esds in cell parameters are only
 used when they are defined by crystal symmetry.  An approximate (isotropic)
 treatment of cell esds is used for estimating esds involving l.s. planes.
;

loop_
_geom_bond_atom_site_label_1
_geom_bond_atom_site_label_2
_geom_bond_distance
_geom_bond_site_symmetry_2
_geom_bond_publ_flag
C1 N2 1.326(15) . ?
C1 N1 1.381(15) . ?
C1 Au1 2.046(10) . ?
C2 N1 1.367(17) . ?
C2 C3 1.361(19) . ?
C2 H2 0.9500 . ?
C3 N2 1.372(14) . ?
C3 H3 0.9500 . ?
C4 N1 1.504(18) . ?
C4 H4A 0.9800 . ?
C4 H4B 0.9800 . ?
C4 H4C 0.9800 . ?
C5 N2 1.456(16) . ?
C5 C8 1.497(16) . ?
C5 C6 1.547(16) . ?
C5 H5 1.0000 . ?
C6 O1 1.427(13) . ?
C6 H6A 0.9900 . ?
C6 H6B 0.9900 . ?
C7 O1 1.429(13) . ?
C7 C9 1.526(15) . ?
C7 C8 1.536(15) . ?
C7 H7 1.0000 . ?
C8 O2 1.452(14) . ?
C8 H8 1.0000 . ?
C9 N3 1.446(14) . ?
C9 C10 1.503(15) . ?
C9 H9 1.0000 . ?
C10 O2 1.452(13) . ?
C10 H10A 0.9900 . ?
C10 H10B 0.9900 . ?
C11 N4 1.373(14) . ?
C11 N3 1.398(13) . ?
C11 Au1 1.983(10) 4_556 ?
C12 N4 1.372(15) . ?
C12 C13 1.406(17) . ?
C12 H12 0.9500 . ?
C13 N3 1.369(13) . ?
C13 H13 0.9500 . ?
C14 N4 1.465(16) . ?
C14 H14A 0.9800 . ?
C14 H14B 0.9800 . ?
C14 H14C 0.9800 . ?
O3 H3A 0.8647 . ?
F1 P1 1.577(7) . ?
F2 P1 1.608(7) . ?
F3 P1 1.610(7) . ?
F4 P1 1.580(8) . ?
F5 P1 1.589(7) . ?
F6 P1 1.601(8) . ?
Au1 C11 1.983(10) 4_556 ?

loop_
_geom_angle_atom_site_label_1
_geom_angle_atom_site_label_2
_geom_angle_atom_site_label_3
_geom_angle
_geom_angle_site_symmetry_1
_geom_angle_site_symmetry_3
_geom_angle_publ_flag
N2 C1 N1 105.1(9) . . ?
N2 C1 Au1 135.1(9) . . ?
N1 C1 Au1 119.8(9) . . ?
N1 C2 C3 105.8(13) . . ?
N1 C2 H2 127.1 . . ?
C3 C2 H2 127.1 . . ?
C2 C3 N2 107.6(12) . . ?
C2 C3 H3 126.2 . . ?
N2 C3 H3 126.2 . . ?
N1 C4 H4A 109.5 . . ?
N1 C4 H4B 109.5 . . ?
H4A C4 H4B 109.5 . . ?
N1 C4 H4C 109.5 . . ?
H4A C4 H4C 109.5 . . ?
H4B C4 H4C 109.5 . . ?
N2 C5 C8 110.7(10) . . ?
N2 C5 C6 113.1(10) . . ?
C8 C5 C6 101.2(9) . . ?
N2 C5 H5 110.5 . . ?
C8 C5 H5 110.5 . . ?
C6 C5 H5 110.5 . . ?
O1 C6 C5 106.0(9) . . ?
O1 C6 H6A 110.5 . . ?
C5 C6 H6A 110.5 . . ?
O1 C6 H6B 110.5 . . ?
C5 C6 H6B 110.5 . . ?
H6A C6 H6B 108.7 . . ?
O1 C7 C9 111.0(10) . . ?
O1 C7 C8 104.4(9) . . ?
C9 C7 C8 104.4(9) . . ?
O1 C7 H7 112.2 . . ?
C9 C7 H7 112.2 . . ?
C8 C7 H7 112.2 . . ?
O2 C8 C5 109.8(10) . . ?
O2 C8 C7 104.4(9) . . ?
C5 C8 C7 105.9(9) . . ?
O2 C8 H8 112.1 . . ?
C5 C8 H8 112.1 . . ?
C7 C8 H8 112.1 . . ?
N3 C9 C10 111.4(9) . . ?
N3 C9 C7 110.3(10) . . ?
C10 C9 C7 101.5(8) . . ?
N3 C9 H9 111.1 . . ?
C10 C9 H9 111.1 . . ?
C7 C9 H9 111.1 . . ?
O2 C10 C9 105.9(9) . . ?
O2 C10 H10A 110.6 . . ?
C9 C10 H10A 110.6 . . ?
O2 C10 H10B 110.6 . . ?
C9 C10 H10B 110.6 . . ?
H10A C10 H10B 108.7 . . ?
N4 C11 N3 102.9(8) . . ?
N4 C11 Au1 128.7(8) . 4_556 ?
N3 C11 Au1 128.3(8) . 4_556 ?
N4 C12 C13 105.8(10) . . ?
N4 C12 H12 127.1 . . ?
C13 C12 H12 127.1 . . ?
N3 C13 C12 106.4(10) . . ?
N3 C13 H13 126.8 . . ?
C12 C13 H13 126.8 . . ?
N4 C14 H14A 109.5 . . ?
N4 C14 H14B 109.5 . . ?
H14A C14 H14B 109.5 . . ?
N4 C14 H14C 109.5 . . ?
H14A C14 H14C 109.5 . . ?
H14B C14 H14C 109.5 . . ?
C2 N1 C1 110.6(11) . . ?
C2 N1 C4 124.5(12) . . ?
C1 N1 C4 124.9(10) . . ?
C1 N2 C3 110.9(11) . . ?
C1 N2 C5 130.1(9) . . ?
C3 N2 C5 119.0(10) . . ?
C13 N3 C11 111.9(9) . . ?
C13 N3 C9 125.9(9) . . ?
C11 N3 C9 122.0(8) . . ?
C11 N4 C12 112.9(10) . . ?
C11 N4 C14 123.6(10) . . ?
C12 N4 C14 123.4(11) . . ?
C6 O1 C7 111.9(8) . . ?
C10 O2 C8 110.4(8) . . ?
F1 P1 F4 90.8(5) . . ?
F1 P1 F5 89.6(5) . . ?
F4 P1 F5 91.8(5) . . ?
F1 P1 F2 89.8(4) . . ?
F4 P1 F2 178.3(5) . . ?
F5 P1 F2 89.8(4) . . ?
F1 P1 F6 91.2(5) . . ?
F4 P1 F6 89.5(5) . . ?
F5 P1 F6 178.5(5) . . ?
F2 P1 F6 89.0(5) . . ?
F1 P1 F3 178.3(5) . . ?
F4 P1 F3 90.7(5) . . ?
F5 P1 F3 91.1(5) . . ?
F2 P1 F3 88.7(4) . . ?
F6 P1 F3 88.1(5) . . ?
C11 Au1 C1 177.6(4) 4_556 . ?

loop_
_geom_torsion_atom_site_label_1
_geom_torsion_atom_site_label_2
_geom_torsion_atom_site_label_3
_geom_torsion_atom_site_label_4
_geom_torsion
_geom_torsion_site_symmetry_1
_geom_torsion_site_symmetry_2
_geom_torsion_site_symmetry_3
_geom_torsion_site_symmetry_4
_geom_torsion_publ_flag
N1 C2 C3 N2 0.0(17) . . . . ?
N2 C5 C6 O1 89.4(11) . . . . ?
C8 C5 C6 O1 -29.1(11) . . . . ?
N2 C5 C8 O2 159.2(9) . . . . ?
C6 C5 C8 O2 -80.5(11) . . . . ?
N2 C5 C8 C7 -88.5(12) . . . . ?
C6 C5 C8 C7 31.7(12) . . . . ?
O1 C7 C8 O2 92.3(10) . . . . ?
C9 C7 C8 O2 -24.3(12) . . . . ?
O1 C7 C8 C5 -23.7(12) . . . . ?
C9 C7 C8 C5 -140.3(9) . . . . ?
O1 C7 C9 N3 165.4(8) . . . . ?
C8 C7 C9 N3 -82.6(11) . . . . ?
O1 C7 C9 C10 -76.5(10) . . . . ?
C8 C7 C9 C10 35.5(12) . . . . ?
N3 C9 C10 O2 83.3(11) . . . . ?
C7 C9 C10 O2 -34.1(11) . . . . ?
N4 C12 C13 N3 -0.1(15) . . . . ?
C3 C2 N1 C1 0.2(17) . . . . ?
C3 C2 N1 C4 -177.3(13) . . . . ?
N2 C1 N1 C2 -0.3(15) . . . . ?
Au1 C1 N1 C2 -178.8(10) . . . . ?
N2 C1 N1 C4 177.2(12) . . . . ?
Au1 C1 N1 C4 -1.3(16) . . . . ?
N1 C1 N2 C3 0.3(13) . . . . ?
Au1 C1 N2 C3 178.4(10) . . . . ?
N1 C1 N2 C5 -176.6(11) . . . . ?
Au1 C1 N2 C5 2(2) . . . . ?
C2 C3 N2 C1 -0.2(16) . . . . ?
C2 C3 N2 C5 177.1(11) . . . . ?
C8 C5 N2 C1 90.6(14) . . . . ?
C6 C5 N2 C1 -22.3(17) . . . . ?
C8 C5 N2 C3 -86.0(13) . . . . ?
C6 C5 N2 C3 161.1(11) . . . . ?
C12 C13 N3 C11 -0.4(15) . . . . ?
C12 C13 N3 C9 -176.7(11) . . . . ?
N4 C11 N3 C13 0.7(13) . . . . ?
Au1 C11 N3 C13 177.0(10) 4_556 . . . ?
N4 C11 N3 C9 177.2(10) . . . . ?
Au1 C11 N3 C9 -6.5(16) 4_556 . . . ?
C10 C9 N3 C13 -32.3(16) . . . . ?
C7 C9 N3 C13 79.6(14) . . . . ?
C10 C9 N3 C11 151.8(10) . . . . ?
C7 C9 N3 C11 -96.4(12) . . . . ?
N3 C11 N4 C12 -0.8(15) . . . . ?
Au1 C11 N4 C12 -177.1(11) 4_556 . . . ?
N3 C11 N4 C14 -176.7(12) . . . . ?
Au1 C11 N4 C14 7(2) 4_556 . . . ?
C13 C12 N4 C11 0.6(17) . . . . ?
C13 C12 N4 C14 176.6(12) . . . . ?
C5 C6 O1 C7 15.6(12) . . . . ?
C9 C7 O1 C6 116.5(10) . . . . ?
C8 C7 O1 C6 4.6(12) . . . . ?
C9 C10 O2 C8 20.0(11) . . . . ?
C5 C8 O2 C10 116.2(10) . . . . ?
C7 C8 O2 C10 3.0(12) . . . . ?

_diffrn_measured_fraction_theta_max 0.994
_diffrn_reflns_theta_full        27.48
_diffrn_measured_fraction_theta_full 0.994
_refine_diff_density_max         1.617
_refine_diff_density_min         -1.658
_refine_diff_density_rms         0.172
# SQUEEZE RESULTS (APPEND TO CIF)
loop_
_platon_squeeze_void_nr
_platon_squeeze_void_average_x
_platon_squeeze_void_average_y
_platon_squeeze_void_average_z
_platon_squeeze_void_volume
_platon_squeeze_void_count_electrons
1 -0.018 0.250 0.000 524.9 5.6
2 -0.010 0.750 0.500 524.9 5.6
3 0.250 0.251 0.500 13.2 -1.2
4 0.250 0.749 1.000 13.2 -1.3
5 0.750 0.249 0.500 13.2 -1.3
6 0.750 0.751 0.000 13.2 -1.2
_platon_squeeze_details          
;
P. van der Sluis & A.L. Spek, Acta Cryst. 1990, A46, 194
;

#===END

data_nd0701
 
_audit_creation_method            SHELXL-97
_chemical_name_systematic
;
 ?
;
_chemical_name_common             ?
_chemical_melting_point           ?
_chemical_formula_moiety          'C28 H36 Ag2 N8 O4, 2(F6 P)'
_chemical_formula_sum
 'C28 H36 Ag2 F12 N8 O4 P2'
_chemical_formula_weight          1054.33
 
loop_
 _atom_type_symbol
 _atom_type_description
 _atom_type_scat_dispersion_real
 _atom_type_scat_dispersion_imag
 _atom_type_scat_source
 'C'  'C'   0.0033   0.0016
 'International Tables Vol C Tables 4.2.6.8 and 6.1.1.4'
 'H'  'H'   0.0000   0.0000
 'International Tables Vol C Tables 4.2.6.8 and 6.1.1.4'
 'N'  'N'   0.0061   0.0033
 'International Tables Vol C Tables 4.2.6.8 and 6.1.1.4'
 'O'  'O'   0.0106   0.0060
 'International Tables Vol C Tables 4.2.6.8 and 6.1.1.4'
 'F'  'F'   0.0171   0.0103
 'International Tables Vol C Tables 4.2.6.8 and 6.1.1.4'
 'P'  'P'   0.1023   0.0942
 'International Tables Vol C Tables 4.2.6.8 and 6.1.1.4'
 'Ag'  'Ag'  -0.8971   1.1015
 'International Tables Vol C Tables 4.2.6.8 and 6.1.1.4'
 
_symmetry_cell_setting            'Monoclinic'
_symmetry_space_group_name_H-M    'P 21'
_symmetry_space_group_name_Hall    'P 2yb'

_symmetry_int_tables_number      4
 
loop_
 _symmetry_equiv_pos_as_xyz
 'x, y, z'
 '-x, y+1/2, -z'
 
_cell_length_a                    10.21320(10)
_cell_length_b                    20.4615(3)
_cell_length_c                    10.8911(2)
_cell_angle_alpha                 90.00
_cell_angle_beta                  106.5040(10)
_cell_angle_gamma                 90.00
_cell_volume                      2182.22(6)
_cell_formula_units_Z             2
_cell_measurement_temperature     150(2)
_cell_measurement_reflns_used     18451
_cell_measurement_theta_min       2.91
_cell_measurement_theta_max       27.485
_chemical_absolute_configuration rm
 
_exptl_crystal_description        block
_exptl_crystal_colour             colourless
_exptl_crystal_size_max           0.40
_exptl_crystal_size_mid           0.22
_exptl_crystal_size_min           0.20
_exptl_crystal_density_meas       ?
_exptl_crystal_density_diffrn     1.605
_exptl_crystal_density_method     'not measured'
_exptl_crystal_F_000              1048
_exptl_absorpt_coefficient_mu     1.062
_exptl_absorpt_correction_type    multi-scan
_exptl_absorpt_correction_T_min   0.6760
_exptl_absorpt_correction_T_max   0.8156
_exptl_absorpt_process_details    'Sortav (Blessing, 1995)'
 
_exptl_special_details
;
 ?
;
 
_diffrn_ambient_temperature       150(2)
_diffrn_radiation_wavelength      0.71073
_diffrn_radiation_type            MoK\a
_diffrn_radiation_source          'fine-focus sealed tube'
_diffrn_radiation_monochromator   graphite
_diffrn_measurement_device_type   KappaCCD
_diffrn_measurement_method        CCD
_diffrn_detector_area_resol_mean  9
_diffrn_standards_number          ?
_diffrn_standards_interval_count  ?
_diffrn_standards_interval_time   ?
_diffrn_standards_decay_%         ?
_diffrn_reflns_number             20815
_diffrn_reflns_av_R_equivalents   0.0754
_diffrn_reflns_av_sigmaI/netI     0.0605
_diffrn_reflns_limit_h_min        -13
_diffrn_reflns_limit_h_max        12
_diffrn_reflns_limit_k_min        -22
_diffrn_reflns_limit_k_max        26
_diffrn_reflns_limit_l_min        -14
_diffrn_reflns_limit_l_max        14
_diffrn_reflns_theta_min          3.13
_diffrn_reflns_theta_max          27.50
_reflns_number_total              9389
_reflns_number_gt                 8896
_reflns_threshold_expression      >2sigma(I)
 
_computing_data_collection        'Collect (Nonius BV, 1997-2000)'
_computing_cell_refinement        'HKL Scalepack (Otwinowski & Minor 1997)'
_computing_data_reduction         
'HKL Denzo and Scalepack (Otwinowski & Minor 1997)'
_computing_structure_solution     'SIR92 (Giacovazzo et al, 1993)'
_computing_structure_refinement   'SHELXL-97 (Sheldrick, 1997)'
_computing_molecular_graphics     'Ortep-3 for Windows (Farrugia, 1997)'
_computing_publication_material   'WinGX publication routines (Farrugia, 1999)'
 
_refine_special_details
;
 Refinement of F^2^ against ALL reflections.  The weighted R-factor wR and
 goodness of fit S are based on F^2^, conventional R-factors R are based
 on F, with F set to zero for negative F^2^. The threshold expression of
 F^2^ > 2sigma(F^2^) is used only for calculating R-factors(gt) etc. and is
 not relevant to the choice of reflections for refinement.  R-factors based
 on F^2^ are statistically about twice as large as those based on F, and R-
 factors based on ALL data will be even larger.

The unit cell contained large regions of diffusely scattered electron 
density indicative of severely disordered solvent which could not be modelled. 
The SQUEEZE routine in PLATON (Spek, 2003) was used to remove the 
contributions of the disordered solvent from diffraction intensities in 
order to improve refinement of ordered parts within the structure.
;
 
_refine_ls_structure_factor_coef  Fsqd
_refine_ls_matrix_type            full
_refine_ls_weighting_scheme       calc
_refine_ls_weighting_details
 'calc w=1/[\s^2^(Fo^2^)+(0.0665P)^2^+10.3462P] where P=(Fo^2^+2Fc^2^)/3'
_atom_sites_solution_primary      direct
_atom_sites_solution_secondary    difmap
_atom_sites_solution_hydrogens    geom
_refine_ls_hydrogen_treatment     constr
_refine_ls_extinction_method      none
_refine_ls_extinction_coef        ?
_refine_ls_abs_structure_details
 'Flack H D (1983), Acta Cryst. A39, 876-881'
_refine_ls_abs_structure_Flack    0.05(3)
_refine_ls_number_reflns          9389
_refine_ls_number_parameters      509
_refine_ls_number_restraints      1
_refine_ls_R_factor_all           0.0583
_refine_ls_R_factor_gt            0.0545
_refine_ls_wR_factor_ref          0.1403
_refine_ls_wR_factor_gt           0.1373
_refine_ls_goodness_of_fit_ref    1.037
_refine_ls_restrained_S_all       1.037
_refine_ls_shift/su_max           0.000
_refine_ls_shift/su_mean          0.000
 
loop_
 _atom_site_label
 _atom_site_type_symbol
 _atom_site_fract_x
 _atom_site_fract_y
 _atom_site_fract_z
 _atom_site_U_iso_or_equiv
 _atom_site_adp_type
 _atom_site_occupancy
 _atom_site_symmetry_multiplicity
 _atom_site_calc_flag
 _atom_site_refinement_flags
 _atom_site_disorder_assembly
 _atom_site_disorder_group
C1 C 0.3177(9) 0.7414(4) 0.6281(8) 0.0357(18) Uani 1 1 d . . .
H1A H 0.2485 0.7267 0.5508 0.054 Uiso 1 1 calc R . .
H1B H 0.4074 0.7246 0.6272 0.054 Uiso 1 1 calc R . .
H1C H 0.3201 0.7892 0.6303 0.054 Uiso 1 1 calc R . .
C2 C 0.1702(7) 0.6830(4) 0.7346(6) 0.0195(13) Uani 1 1 d . . .
C3 C 0.3630(8) 0.7251(4) 0.8658(7) 0.0320(16) Uani 1 1 d . . .
H3 H 0.4484 0.7470 0.8943 0.038 Uiso 1 1 calc R . .
C4 C 0.2960(8) 0.6964(4) 0.9382(7) 0.0297(16) Uani 1 1 d . . .
H4 H 0.3249 0.6939 1.0290 0.036 Uiso 1 1 calc R . .
C5 C 0.0908(7) 0.6278(3) 0.9098(6) 0.0210(13) Uani 1 1 d . . .
H5 H 0.1091 0.6345 1.0042 0.025 Uiso 1 1 calc R . .
C6 C -0.0626(7) 0.6352(3) 0.8431(6) 0.0222(13) Uani 1 1 d . . .
H6A H -0.1158 0.6288 0.9052 0.027 Uiso 1 1 calc R . .
H6B H -0.0824 0.6794 0.8052 0.027 Uiso 1 1 calc R . .
C7 C 0.1187(6) 0.5573(3) 0.8824(6) 0.0196(12) Uani 1 1 d . . .
H7 H 0.2138 0.5512 0.8765 0.024 Uiso 1 1 calc R . .
C8 C 0.0111(7) 0.5413(3) 0.7546(6) 0.0219(13) Uani 1 1 d . . .
H8 H 0.0500 0.5450 0.6804 0.026 Uiso 1 1 calc R . .
C9 C -0.0222(8) 0.4709(3) 0.9146(6) 0.0264(14) Uani 1 1 d . . .
H9A H -0.1088 0.4867 0.9278 0.032 Uiso 1 1 calc R . .
H9B H -0.0040 0.4261 0.9499 0.032 Uiso 1 1 calc R . .
C10 C -0.0292(7) 0.4719(3) 0.7735(6) 0.0214(13) Uani 1 1 d . . .
H10 H -0.1241 0.4625 0.7191 0.026 Uiso 1 1 calc R . .
C11 C 0.1961(7) 0.4091(4) 0.8280(6) 0.0244(13) Uani 1 1 d . . .
H11 H 0.2259 0.4173 0.9175 0.029 Uiso 1 1 calc R . .
C12 C 0.2656(7) 0.3785(4) 0.7583(7) 0.0276(15) Uani 1 1 d . . .
H12 H 0.3540 0.3598 0.7892 0.033 Uiso 1 1 calc R . .
C13 C 0.2249(9) 0.3506(4) 0.5263(8) 0.0343(17) Uani 1 1 d . . .
H13A H 0.1434 0.3344 0.4621 0.051 Uiso 1 1 calc R . .
H13B H 0.2882 0.3142 0.5573 0.051 Uiso 1 1 calc R . .
H13C H 0.2696 0.3839 0.4878 0.051 Uiso 1 1 calc R . .
C14 C 0.0637(7) 0.4081(4) 0.6240(6) 0.0229(13) Uani 1 1 d . . .
C15 C -0.0215(8) 0.7433(4) 0.2664(8) 0.0338(17) Uani 1 1 d . . .
H15A H 0.0537 0.7414 0.3457 0.051 Uiso 1 1 calc R . .
H15B H -0.0377 0.7888 0.2382 0.051 Uiso 1 1 calc R . .
H15C H 0.0024 0.7177 0.1999 0.051 Uiso 1 1 calc R . .
C16 C -0.1529(7) 0.6860(4) 0.3951(6) 0.0212(14) Uani 1 1 d . . .
C17 C -0.2695(7) 0.7148(4) 0.1936(7) 0.0269(15) Uani 1 1 d . . .
H17 H -0.2875 0.7314 0.1090 0.032 Uiso 1 1 calc R . .
C18 C -0.3588(7) 0.6840(4) 0.2480(6) 0.0249(14) Uani 1 1 d . . .
H18 H -0.4532 0.6762 0.2092 0.030 Uiso 1 1 calc R . .
C19 C -0.3315(7) 0.6219(3) 0.4559(6) 0.0202(12) Uani 1 1 d . . .
H19 H -0.2819 0.6296 0.5481 0.024 Uiso 1 1 calc R . .
C20 C -0.4851(7) 0.6228(3) 0.4334(7) 0.0260(14) Uani 1 1 d . . .
H20A H -0.5096 0.6047 0.5083 0.031 Uiso 1 1 calc R . .
H20B H -0.5208 0.6680 0.4180 0.031 Uiso 1 1 calc R . .
C21 C -0.3095(7) 0.5516(3) 0.4147(6) 0.0205(13) Uani 1 1 d . . .
H21 H -0.2212 0.5472 0.3928 0.025 Uiso 1 1 calc R . .
C22 C -0.4319(6) 0.5411(3) 0.2980(7) 0.0226(13) Uani 1 1 d . . .
H22 H -0.4116 0.5511 0.2154 0.027 Uiso 1 1 calc R . .
C23 C -0.4663(7) 0.4694(3) 0.3107(6) 0.0226(13) Uani 1 1 d . . .
H23 H -0.5666 0.4618 0.2742 0.027 Uiso 1 1 calc R . .
C24 C -0.4232(7) 0.4579(3) 0.4543(7) 0.0249(14) Uani 1 1 d . . .
H24A H -0.5021 0.4631 0.4891 0.030 Uiso 1 1 calc R . .
H24B H -0.3863 0.4131 0.4740 0.030 Uiso 1 1 calc R . .
C25 C -0.4404(7) 0.4199(4) 0.1123(7) 0.0308(15) Uani 1 1 d . . .
H25 H -0.5292 0.4311 0.0605 0.037 Uiso 1 1 calc R . .
C26 C -0.3389(8) 0.3900(4) 0.0723(8) 0.0312(16) Uani 1 1 d . . .
H26 H -0.3432 0.3762 -0.0120 0.037 Uiso 1 1 calc R . .
C27 C -0.0991(8) 0.3544(4) 0.1775(7) 0.0314(16) Uani 1 1 d . . .
H27A H -0.0739 0.3206 0.2438 0.047 Uiso 1 1 calc R . .
H27B H -0.0280 0.3882 0.1945 0.047 Uiso 1 1 calc R . .
H27C H -0.1082 0.3348 0.0935 0.047 Uiso 1 1 calc R . .
C28 C -0.2575(6) 0.4100(4) 0.2818(6) 0.0214(12) Uani 1 1 d . . .
N1 N 0.2844(6) 0.7171(3) 0.7396(6) 0.0232(12) Uani 1 1 d . . .
N2 N 0.1783(6) 0.6710(3) 0.8602(5) 0.0225(11) Uani 1 1 d . . .
N3 N 0.0696(6) 0.4269(3) 0.7423(5) 0.0194(11) Uani 1 1 d . . .
N4 N 0.1853(7) 0.3791(3) 0.6335(6) 0.0274(13) Uani 1 1 d . . .
N5 N -0.1475(7) 0.7160(3) 0.2898(6) 0.0271(13) Uani 1 1 d . . .
N6 N -0.2836(6) 0.6665(3) 0.3712(5) 0.0213(11) Uani 1 1 d . . .
N7 N -0.3887(6) 0.4303(3) 0.2411(5) 0.0219(12) Uani 1 1 d . . .
N8 N -0.2315(6) 0.3845(3) 0.1789(6) 0.0257(12) Uani 1 1 d . . .
O1 O -0.0978(5) 0.5858(2) 0.7440(5) 0.0255(10) Uani 1 1 d . . .
O2 O 0.0888(5) 0.5140(2) 0.9744(4) 0.0255(10) Uani 1 1 d . . .
O3 O -0.5409(5) 0.5820(2) 0.3200(5) 0.0276(11) Uani 1 1 d . . .
O4 O -0.3193(5) 0.5058(2) 0.5097(5) 0.0249(10) Uani 1 1 d . . .
F1 F 0.2027(5) 0.8263(3) 1.1466(5) 0.0408(11) Uani 1 1 d . . .
F2 F 0.2385(5) 0.8299(2) 1.3605(4) 0.0367(11) Uani 1 1 d . . .
F3 F 0.3759(6) 0.8872(2) 1.2696(5) 0.0478(13) Uani 1 1 d . . .
F4 F 0.4586(5) 0.7986(3) 1.3909(5) 0.0475(13) Uani 1 1 d . . .
F5 F 0.4217(4) 0.7950(2) 1.1766(4) 0.0329(10) Uani 1 1 d . . .
F6 F 0.2835(5) 0.7378(2) 1.2661(5) 0.0360(10) Uani 1 1 d . . .
F7 F 0.3473(5) 0.3143(3) 0.0614(5) 0.0428(12) Uani 1 1 d . . .
F8 F 0.3940(5) 0.3279(2) 0.2767(5) 0.0432(12) Uani 1 1 d . . .
F9 F 0.3226(5) 0.2300(2) 0.1883(5) 0.0376(11) Uani 1 1 d . . .
F10 F 0.1825(5) 0.2898(3) 0.2684(4) 0.0402(11) Uani 1 1 d . . .
F11 F 0.1348(5) 0.2786(3) 0.0562(5) 0.0434(12) Uani 1 1 d . . .
F12 F 0.2102(5) 0.3760(2) 0.1464(5) 0.0397(11) Uani 1 1 d . . .
P1 P 0.33077(18) 0.81216(9) 1.26837(16) 0.0223(3) Uani 1 1 d . . .
P2 P 0.26492(17) 0.30276(9) 0.16747(17) 0.0229(3) Uani 1 1 d . . .
Ag1 Ag 0.00497(5) 0.67745(2) 0.56705(4) 0.02160(12) Uani 1 1 d . . .
Ag2 Ag -0.10342(5) 0.41413(2) 0.45971(4) 0.02096(11) Uani 1 1 d . . .
 
loop_
 _atom_site_aniso_label
 _atom_site_aniso_U_11
 _atom_site_aniso_U_22
 _atom_site_aniso_U_33
 _atom_site_aniso_U_23
 _atom_site_aniso_U_13
 _atom_site_aniso_U_12
C1 0.029(4) 0.038(4) 0.040(4) 0.001(3) 0.011(3) -0.006(3)
C2 0.021(3) 0.019(3) 0.019(3) -0.003(3) 0.006(2) -0.003(3)
C3 0.032(4) 0.029(4) 0.029(4) -0.005(3) -0.001(3) -0.010(3)
C4 0.024(3) 0.034(4) 0.025(3) -0.009(3) -0.002(3) -0.006(3)
C5 0.023(3) 0.022(3) 0.017(3) 0.000(2) 0.005(2) 0.001(2)
C6 0.020(3) 0.024(3) 0.027(3) -0.003(2) 0.013(3) 0.004(2)
C7 0.013(3) 0.028(3) 0.016(3) 0.000(2) 0.002(2) -0.001(2)
C8 0.028(3) 0.022(3) 0.020(3) 0.002(2) 0.016(3) 0.008(3)
C9 0.031(4) 0.024(3) 0.023(3) -0.003(3) 0.007(3) -0.005(3)
C10 0.022(3) 0.021(3) 0.020(3) -0.002(2) 0.004(2) -0.001(2)
C11 0.019(3) 0.023(3) 0.026(3) 0.001(3) -0.002(2) -0.002(3)
C12 0.020(3) 0.027(4) 0.033(4) 0.000(3) 0.004(3) 0.001(3)
C13 0.035(4) 0.037(4) 0.034(4) -0.006(3) 0.014(3) 0.014(3)
C14 0.021(3) 0.017(3) 0.027(3) 0.000(3) 0.001(2) 0.002(3)
C15 0.025(4) 0.036(4) 0.038(4) 0.005(3) 0.006(3) -0.003(3)
C16 0.022(3) 0.016(4) 0.022(3) -0.001(3) 0.000(2) -0.001(3)
C17 0.021(3) 0.029(4) 0.027(3) 0.010(3) 0.000(3) -0.002(3)
C18 0.023(3) 0.020(3) 0.029(3) 0.012(3) 0.002(3) -0.001(3)
C19 0.019(3) 0.020(3) 0.020(3) 0.004(2) 0.002(2) -0.001(2)
C20 0.023(3) 0.024(3) 0.032(4) 0.001(3) 0.009(3) 0.003(3)
C21 0.024(3) 0.018(3) 0.017(3) 0.005(2) 0.002(2) -0.003(2)
C22 0.010(3) 0.026(3) 0.032(3) 0.003(3) 0.007(3) 0.003(2)
C23 0.017(3) 0.023(3) 0.028(3) 0.002(3) 0.006(2) -0.001(2)
C24 0.027(3) 0.020(3) 0.032(3) -0.002(3) 0.014(3) -0.004(3)
C25 0.025(3) 0.034(4) 0.032(3) -0.001(3) 0.006(3) -0.003(3)
C26 0.028(4) 0.031(4) 0.035(4) -0.003(3) 0.009(3) 0.003(3)
C27 0.038(4) 0.032(4) 0.029(3) -0.001(3) 0.017(3) 0.007(3)
C28 0.020(3) 0.022(3) 0.025(3) 0.001(3) 0.010(2) -0.004(3)
N1 0.016(3) 0.023(3) 0.027(3) -0.004(2) 0.002(2) -0.002(2)
N2 0.026(3) 0.021(3) 0.018(2) -0.008(2) 0.002(2) 0.000(2)
N3 0.022(3) 0.017(3) 0.018(2) 0.0017(19) 0.003(2) 0.004(2)
N4 0.028(3) 0.026(3) 0.028(3) -0.004(2) 0.007(2) 0.006(2)
N5 0.031(3) 0.019(3) 0.026(3) 0.005(2) 0.000(2) 0.000(2)
N6 0.022(3) 0.018(3) 0.021(2) 0.006(2) 0.000(2) -0.002(2)
N7 0.020(3) 0.020(3) 0.025(3) -0.002(2) 0.004(2) -0.001(2)
N8 0.025(3) 0.024(3) 0.025(3) -0.001(2) 0.003(2) 0.001(2)
O1 0.025(2) 0.022(2) 0.027(2) -0.0064(19) 0.0028(19) 0.0063(19)
O2 0.031(3) 0.026(3) 0.018(2) 0.0029(18) 0.0052(19) -0.004(2)
O3 0.014(2) 0.024(2) 0.043(3) 0.001(2) 0.004(2) 0.0018(18)
O4 0.026(2) 0.019(2) 0.028(2) 0.0073(18) 0.0052(19) -0.0021(19)
F1 0.030(2) 0.054(3) 0.034(2) 0.004(2) 0.0027(19) 0.011(2)
F2 0.040(3) 0.048(3) 0.031(2) -0.0054(19) 0.025(2) -0.009(2)
F3 0.063(3) 0.032(2) 0.060(3) -0.008(2) 0.037(3) -0.020(2)
F4 0.028(2) 0.070(4) 0.035(2) 0.005(2) -0.006(2) -0.007(2)
F5 0.030(2) 0.048(3) 0.028(2) -0.0012(18) 0.0189(17) 0.006(2)
F6 0.034(2) 0.026(2) 0.047(3) 0.0000(19) 0.009(2) -0.0046(18)
F7 0.040(3) 0.053(3) 0.046(3) 0.006(2) 0.030(2) 0.001(2)
F8 0.033(3) 0.040(3) 0.043(3) -0.005(2) -0.009(2) -0.005(2)
F9 0.039(3) 0.022(2) 0.058(3) -0.001(2) 0.024(2) 0.0021(18)
F10 0.048(3) 0.049(3) 0.030(2) 0.002(2) 0.020(2) 0.002(2)
F11 0.034(3) 0.059(3) 0.034(2) -0.014(2) 0.005(2) -0.005(2)
F12 0.039(3) 0.029(2) 0.052(3) 0.003(2) 0.016(2) 0.009(2)
P1 0.0224(8) 0.0249(8) 0.0201(7) 0.0006(6) 0.0068(6) -0.0013(7)
P2 0.0192(8) 0.0241(9) 0.0261(8) -0.0034(7) 0.0075(6) 0.0006(7)
Ag1 0.0198(2) 0.0224(2) 0.0204(2) 0.00128(19) 0.00225(17) -0.00341(19)
Ag2 0.0209(2) 0.0238(2) 0.0176(2) 0.00022(18) 0.00445(16) 0.00327(19)
 
_geom_special_details
;
 All esds (except the esd in the dihedral angle between two l.s. planes)
 are estimated using the full covariance matrix.  The cell esds are taken
 into account individually in the estimation of esds in distances, angles
 and torsion angles; correlations between esds in cell parameters are only
 used when they are defined by crystal symmetry.  An approximate (isotropic)
 treatment of cell esds is used for estimating esds involving l.s. planes.
;
 
loop_
 _geom_bond_atom_site_label_1
 _geom_bond_atom_site_label_2
 _geom_bond_distance
 _geom_bond_site_symmetry_2
 _geom_bond_publ_flag
C1 N1 1.439(10) . ?
C1 H1A 0.9800 . ?
C1 H1B 0.9800 . ?
C1 H1C 0.9800 . ?
C2 N1 1.347(9) . ?
C2 N2 1.369(8) . ?
C2 Ag1 2.107(6) . ?
C3 C4 1.319(11) . ?
C3 N1 1.391(9) . ?
C3 H3 0.9500 . ?
C4 N2 1.363(9) . ?
C4 H4 0.9500 . ?
C5 N2 1.466(9) . ?
C5 C7 1.517(9) . ?
C5 C6 1.535(9) . ?
C5 H5 1.0000 . ?
C6 O1 1.448(8) . ?
C6 H6A 0.9900 . ?
C6 H6B 0.9900 . ?
C7 O2 1.434(8) . ?
C7 C8 1.543(9) . ?
C7 H7 1.0000 . ?
C8 O1 1.416(8) . ?
C8 C10 1.508(9) . ?
C8 H8 1.0000 . ?
C9 O2 1.438(8) . ?
C9 C10 1.519(9) . ?
C9 H9A 0.9900 . ?
C9 H9B 0.9900 . ?
C10 N3 1.476(8) . ?
C10 H10 1.0000 . ?
C11 C12 1.334(11) . ?
C11 N3 1.409(8) . ?
C11 H11 0.9500 . ?
C12 N4 1.374(9) . ?
C12 H12 0.9500 . ?
C13 N4 1.460(9) . ?
C13 H13A 0.9800 . ?
C13 H13B 0.9800 . ?
C13 H13C 0.9800 . ?
C14 N3 1.330(9) . ?
C14 N4 1.354(9) . ?
C14 Ag2 2.096(6) . ?
C15 N5 1.490(10) . ?
C15 H15A 0.9800 . ?
C15 H15B 0.9800 . ?
C15 H15C 0.9800 . ?
C16 N5 1.316(9) . ?
C16 N6 1.345(9) . ?
C16 Ag1 2.103(6) . ?
C17 C18 1.374(10) . ?
C17 N5 1.381(9) . ?
C17 H17 0.9500 . ?
C18 N6 1.390(8) . ?
C18 H18 0.9500 . ?
C19 N6 1.477(8) . ?
C19 C20 1.518(9) . ?
C19 C21 1.541(9) . ?
C19 H19 1.0000 . ?
C20 O3 1.465(9) . ?
C20 H20A 0.9900 . ?
C20 H20B 0.9900 . ?
C21 O4 1.421(7) . ?
C21 C22 1.525(10) . ?
C21 H21 1.0000 . ?
C22 O3 1.466(8) . ?
C22 C23 1.523(10) . ?
C22 H22 1.0000 . ?
C23 N7 1.479(9) . ?
C23 C24 1.518(9) . ?
C23 H23 1.0000 . ?
C24 O4 1.444(8) . ?
C24 H24A 0.9900 . ?
C24 H24B 0.9900 . ?
C25 N7 1.368(9) . ?
C25 C26 1.376(11) . ?
C25 H25 0.9500 . ?
C26 N8 1.357(10) . ?
C26 H26 0.9500 . ?
C27 N8 1.489(10) . ?
C27 H27A 0.9800 . ?
C27 H27B 0.9800 . ?
C27 H27C 0.9800 . ?
C28 N8 1.330(9) . ?
C28 N7 1.351(9) . ?
C28 Ag2 2.123(6) . ?
F1 P1 1.602(5) . ?
F2 P1 1.601(5) . ?
F3 P1 1.603(5) . ?
F4 P1 1.604(5) . ?
F5 P1 1.585(4) . ?
F6 P1 1.595(5) . ?
F7 P2 1.628(5) . ?
F8 P2 1.589(5) . ?
F9 P2 1.594(5) . ?
F10 P2 1.585(5) . ?
F11 P2 1.601(5) . ?
F12 P2 1.593(5) . ?
 
loop_
 _geom_angle_atom_site_label_1
 _geom_angle_atom_site_label_2
 _geom_angle_atom_site_label_3
 _geom_angle
 _geom_angle_site_symmetry_1
 _geom_angle_site_symmetry_3
 _geom_angle_publ_flag
N1 C1 H1A 109.5 . . ?
N1 C1 H1B 109.5 . . ?
H1A C1 H1B 109.5 . . ?
N1 C1 H1C 109.5 . . ?
H1A C1 H1C 109.5 . . ?
H1B C1 H1C 109.5 . . ?
N1 C2 N2 104.3(5) . . ?
N1 C2 Ag1 122.3(5) . . ?
N2 C2 Ag1 131.4(5) . . ?
C4 C3 N1 106.6(6) . . ?
C4 C3 H3 126.7 . . ?
N1 C3 H3 126.7 . . ?
C3 C4 N2 108.2(6) . . ?
C3 C4 H4 125.9 . . ?
N2 C4 H4 125.9 . . ?
N2 C5 C7 109.4(5) . . ?
N2 C5 C6 114.4(5) . . ?
C7 C5 C6 102.9(5) . . ?
N2 C5 H5 109.9 . . ?
C7 C5 H5 109.9 . . ?
C6 C5 H5 109.9 . . ?
O1 C6 C5 106.7(5) . . ?
O1 C6 H6A 110.4 . . ?
C5 C6 H6A 110.4 . . ?
O1 C6 H6B 110.4 . . ?
C5 C6 H6B 110.4 . . ?
H6A C6 H6B 108.6 . . ?
O2 C7 C5 111.1(5) . . ?
O2 C7 C8 105.1(5) . . ?
C5 C7 C8 104.7(5) . . ?
O2 C7 H7 111.8 . . ?
C5 C7 H7 111.8 . . ?
C8 C7 H7 111.8 . . ?
O1 C8 C10 112.2(6) . . ?
O1 C8 C7 106.2(5) . . ?
C10 C8 C7 103.2(5) . . ?
O1 C8 H8 111.6 . . ?
C10 C8 H8 111.6 . . ?
C7 C8 H8 111.6 . . ?
O2 C9 C10 104.8(5) . . ?
O2 C9 H9A 110.8 . . ?
C10 C9 H9A 110.8 . . ?
O2 C9 H9B 110.8 . . ?
C10 C9 H9B 110.8 . . ?
H9A C9 H9B 108.9 . . ?
N3 C10 C8 109.0(5) . . ?
N3 C10 C9 112.7(6) . . ?
C8 C10 C9 102.4(5) . . ?
N3 C10 H10 110.8 . . ?
C8 C10 H10 110.8 . . ?
C9 C10 H10 110.8 . . ?
C12 C11 N3 106.2(6) . . ?
C12 C11 H11 126.9 . . ?
N3 C11 H11 126.9 . . ?
C11 C12 N4 107.2(6) . . ?
C11 C12 H12 126.4 . . ?
N4 C12 H12 126.4 . . ?
N4 C13 H13A 109.5 . . ?
N4 C13 H13B 109.5 . . ?
H13A C13 H13B 109.5 . . ?
N4 C13 H13C 109.5 . . ?
H13A C13 H13C 109.5 . . ?
H13B C13 H13C 109.5 . . ?
N3 C14 N4 105.3(6) . . ?
N3 C14 Ag2 127.7(5) . . ?
N4 C14 Ag2 126.7(5) . . ?
N5 C15 H15A 109.5 . . ?
N5 C15 H15B 109.5 . . ?
H15A C15 H15B 109.5 . . ?
N5 C15 H15C 109.5 . . ?
H15A C15 H15C 109.5 . . ?
H15B C15 H15C 109.5 . . ?
N5 C16 N6 104.7(6) . . ?
N5 C16 Ag1 127.2(5) . . ?
N6 C16 Ag1 128.0(5) . . ?
C18 C17 N5 104.3(6) . . ?
C18 C17 H17 127.9 . . ?
N5 C17 H17 127.9 . . ?
C17 C18 N6 106.4(6) . . ?
C17 C18 H18 126.8 . . ?
N6 C18 H18 126.8 . . ?
N6 C19 C20 113.7(5) . . ?
N6 C19 C21 107.0(5) . . ?
C20 C19 C21 101.2(5) . . ?
N6 C19 H19 111.5 . . ?
C20 C19 H19 111.5 . . ?
C21 C19 H19 111.5 . . ?
O3 C20 C19 105.4(5) . . ?
O3 C20 H20A 110.7 . . ?
C19 C20 H20A 110.7 . . ?
O3 C20 H20B 110.7 . . ?
C19 C20 H20B 110.7 . . ?
H20A C20 H20B 108.8 . . ?
O4 C21 C22 107.6(5) . . ?
O4 C21 C19 111.0(5) . . ?
C22 C21 C19 102.8(5) . . ?
O4 C21 H21 111.7 . . ?
C22 C21 H21 111.7 . . ?
C19 C21 H21 111.7 . . ?
O3 C22 C23 109.3(5) . . ?
O3 C22 C21 105.3(6) . . ?
C23 C22 C21 102.5(5) . . ?
O3 C22 H22 113.0 . . ?
C23 C22 H22 113.0 . . ?
C21 C22 H22 113.0 . . ?
N7 C23 C24 113.7(6) . . ?
N7 C23 C22 107.7(5) . . ?
C24 C23 C22 103.7(5) . . ?
N7 C23 H23 110.5 . . ?
C24 C23 H23 110.5 . . ?
C22 C23 H23 110.5 . . ?
O4 C24 C23 106.8(5) . . ?
O4 C24 H24A 110.4 . . ?
C23 C24 H24A 110.4 . . ?
O4 C24 H24B 110.4 . . ?
C23 C24 H24B 110.4 . . ?
H24A C24 H24B 108.6 . . ?
N7 C25 C26 106.7(6) . . ?
N7 C25 H25 126.7 . . ?
C26 C25 H25 126.7 . . ?
N8 C26 C25 105.4(7) . . ?
N8 C26 H26 127.3 . . ?
C25 C26 H26 127.3 . . ?
N8 C27 H27A 109.5 . . ?
N8 C27 H27B 109.5 . . ?
H27A C27 H27B 109.5 . . ?
N8 C27 H27C 109.5 . . ?
H27A C27 H27C 109.5 . . ?
H27B C27 H27C 109.5 . . ?
N8 C28 N7 105.1(6) . . ?
N8 C28 Ag2 120.7(5) . . ?
N7 C28 Ag2 134.1(5) . . ?
C2 N1 C3 110.6(6) . . ?
C2 N1 C1 123.7(6) . . ?
C3 N1 C1 125.8(6) . . ?
C4 N2 C2 110.3(6) . . ?
C4 N2 C5 121.5(6) . . ?
C2 N2 C5 127.3(6) . . ?
C14 N3 C11 110.4(6) . . ?
C14 N3 C10 123.9(5) . . ?
C11 N3 C10 124.5(5) . . ?
C14 N4 C12 110.8(6) . . ?
C14 N4 C13 124.8(6) . . ?
C12 N4 C13 124.4(6) . . ?
C16 N5 C17 113.7(6) . . ?
C16 N5 C15 125.2(6) . . ?
C17 N5 C15 120.9(6) . . ?
C16 N6 C18 110.9(5) . . ?
C16 N6 C19 123.3(5) . . ?
C18 N6 C19 124.9(5) . . ?
C28 N7 C25 110.3(6) . . ?
C28 N7 C23 128.6(6) . . ?
C25 N7 C23 120.2(6) . . ?
C28 N8 C26 112.4(6) . . ?
C28 N8 C27 124.8(6) . . ?
C26 N8 C27 122.8(6) . . ?
C8 O1 C6 111.4(5) . . ?
C7 O2 C9 111.0(5) . . ?
C20 O3 C22 109.4(5) . . ?
C21 O4 C24 109.8(5) . . ?
F5 P1 F6 90.4(3) . . ?
F5 P1 F2 179.7(3) . . ?
F6 P1 F2 89.8(3) . . ?
F5 P1 F1 90.3(3) . . ?
F6 P1 F1 89.2(3) . . ?
F2 P1 F1 89.4(3) . . ?
F5 P1 F3 90.0(3) . . ?
F6 P1 F3 179.1(3) . . ?
F2 P1 F3 89.8(3) . . ?
F1 P1 F3 90.0(3) . . ?
F5 P1 F4 90.1(3) . . ?
F6 P1 F4 91.1(3) . . ?
F2 P1 F4 90.2(3) . . ?
F1 P1 F4 179.5(3) . . ?
F3 P1 F4 89.7(3) . . ?
F10 P2 F8 91.5(3) . . ?
F10 P2 F12 91.4(3) . . ?
F8 P2 F12 89.2(3) . . ?
F10 P2 F9 89.6(3) . . ?
F8 P2 F9 90.1(3) . . ?
F12 P2 F9 178.8(3) . . ?
F10 P2 F11 89.0(3) . . ?
F8 P2 F11 179.1(3) . . ?
F12 P2 F11 90.0(3) . . ?
F9 P2 F11 90.7(3) . . ?
F10 P2 F7 178.4(3) . . ?
F8 P2 F7 89.9(3) . . ?
F12 P2 F7 89.5(3) . . ?
F9 P2 F7 89.5(3) . . ?
F11 P2 F7 89.6(3) . . ?
C16 Ag1 C2 171.7(3) . . ?
C14 Ag2 C28 171.7(3) . . ?
 
loop_
 _geom_torsion_atom_site_label_1
 _geom_torsion_atom_site_label_2
 _geom_torsion_atom_site_label_3
 _geom_torsion_atom_site_label_4
 _geom_torsion
 _geom_torsion_site_symmetry_1
 _geom_torsion_site_symmetry_2
 _geom_torsion_site_symmetry_3
 _geom_torsion_site_symmetry_4
 _geom_torsion_publ_flag
N1 C3 C4 N2 -0.1(9) . . . . ?
N2 C5 C6 O1 95.0(6) . . . . ?
C7 C5 C6 O1 -23.7(7) . . . . ?
N2 C5 C7 O2 153.0(5) . . . . ?
C6 C5 C7 O2 -85.0(6) . . . . ?
N2 C5 C7 C8 -94.0(6) . . . . ?
C6 C5 C7 C8 28.0(6) . . . . ?
O2 C7 C8 O1 93.9(6) . . . . ?
C5 C7 C8 O1 -23.2(7) . . . . ?
O2 C7 C8 C10 -24.3(6) . . . . ?
C5 C7 C8 C10 -141.5(5) . . . . ?
O1 C8 C10 N3 161.9(5) . . . . ?
C7 C8 C10 N3 -84.2(6) . . . . ?
O1 C8 C10 C9 -78.6(7) . . . . ?
C7 C8 C10 C9 35.4(7) . . . . ?
O2 C9 C10 N3 82.7(6) . . . . ?
O2 C9 C10 C8 -34.2(7) . . . . ?
N3 C11 C12 N4 1.5(8) . . . . ?
N5 C17 C18 N6 -2.3(8) . . . . ?
N6 C19 C20 O3 79.3(7) . . . . ?
C21 C19 C20 O3 -35.1(6) . . . . ?
N6 C19 C21 O4 165.1(5) . . . . ?
C20 C19 C21 O4 -75.6(6) . . . . ?
N6 C19 C21 C22 -80.1(6) . . . . ?
C20 C19 C21 C22 39.2(6) . . . . ?
O4 C21 C22 O3 87.8(6) . . . . ?
C19 C21 C22 O3 -29.4(7) . . . . ?
O4 C21 C22 C23 -26.5(7) . . . . ?
C19 C21 C22 C23 -143.7(5) . . . . ?
O3 C22 C23 N7 158.3(5) . . . . ?
C21 C22 C23 N7 -90.4(6) . . . . ?
O3 C22 C23 C24 -80.9(6) . . . . ?
C21 C22 C23 C24 30.4(7) . . . . ?
N7 C23 C24 O4 91.8(6) . . . . ?
C22 C23 C24 O4 -24.8(7) . . . . ?
N7 C25 C26 N8 -0.4(9) . . . . ?
N2 C2 N1 C3 1.0(8) . . . . ?
Ag1 C2 N1 C3 166.7(5) . . . . ?
N2 C2 N1 C1 -178.9(7) . . . . ?
Ag1 C2 N1 C1 -13.3(10) . . . . ?
C4 C3 N1 C2 -0.6(9) . . . . ?
C4 C3 N1 C1 179.3(7) . . . . ?
C3 C4 N2 C2 0.7(9) . . . . ?
C3 C4 N2 C5 170.9(6) . . . . ?
N1 C2 N2 C4 -1.1(8) . . . . ?
Ag1 C2 N2 C4 -164.8(6) . . . . ?
N1 C2 N2 C5 -170.5(6) . . . . ?
Ag1 C2 N2 C5 25.7(11) . . . . ?
C7 C5 N2 C4 -99.3(7) . . . . ?
C6 C5 N2 C4 145.8(6) . . . . ?
C7 C5 N2 C2 69.1(8) . . . . ?
C6 C5 N2 C2 -45.8(9) . . . . ?
N4 C14 N3 C11 -0.5(9) . . . . ?
Ag2 C14 N3 C11 174.7(6) . . . . ?
N4 C14 N3 C10 167.4(6) . . . . ?
Ag2 C14 N3 C10 -17.4(11) . . . . ?
C12 C11 N3 C14 -0.7(9) . . . . ?
C12 C11 N3 C10 -168.5(6) . . . . ?
C8 C10 N3 C14 -82.5(8) . . . . ?
C9 C10 N3 C14 164.5(7) . . . . ?
C8 C10 N3 C11 83.7(7) . . . . ?
C9 C10 N3 C11 -29.2(9) . . . . ?
N3 C14 N4 C12 1.4(9) . . . . ?
Ag2 C14 N4 C12 -173.8(6) . . . . ?
N3 C14 N4 C13 179.9(7) . . . . ?
Ag2 C14 N4 C13 4.7(12) . . . . ?
C11 C12 N4 C14 -1.9(9) . . . . ?
C11 C12 N4 C13 179.7(8) . . . . ?
N6 C16 N5 C17 -2.5(9) . . . . ?
Ag1 C16 N5 C17 -178.3(5) . . . . ?
N6 C16 N5 C15 -176.5(7) . . . . ?
Ag1 C16 N5 C15 7.7(11) . . . . ?
C18 C17 N5 C16 3.1(9) . . . . ?
C18 C17 N5 C15 177.3(7) . . . . ?
N5 C16 N6 C18 0.9(8) . . . . ?
Ag1 C16 N6 C18 176.7(5) . . . . ?
N5 C16 N6 C19 170.2(6) . . . . ?
Ag1 C16 N6 C19 -14.0(10) . . . . ?
C17 C18 N6 C16 0.9(8) . . . . ?
C17 C18 N6 C19 -168.2(6) . . . . ?
C20 C19 N6 C16 162.4(6) . . . . ?
C21 C19 N6 C16 -86.7(7) . . . . ?
C20 C19 N6 C18 -29.8(9) . . . . ?
C21 C19 N6 C18 81.1(8) . . . . ?
N8 C28 N7 C25 -2.9(9) . . . . ?
Ag2 C28 N7 C25 175.3(7) . . . . ?
N8 C28 N7 C23 -171.8(6) . . . . ?
Ag2 C28 N7 C23 6.3(12) . . . . ?
C26 C25 N7 C28 2.1(9) . . . . ?
C26 C25 N7 C23 172.1(6) . . . . ?
C24 C23 N7 C28 -31.8(10) . . . . ?
C22 C23 N7 C28 82.5(8) . . . . ?
C24 C23 N7 C25 160.2(6) . . . . ?
C22 C23 N7 C25 -85.5(7) . . . . ?
N7 C28 N8 C26 2.6(9) . . . . ?
Ag2 C28 N8 C26 -175.8(6) . . . . ?
N7 C28 N8 C27 -178.8(6) . . . . ?
Ag2 C28 N8 C27 2.7(11) . . . . ?
C25 C26 N8 C28 -1.4(9) . . . . ?
C25 C26 N8 C27 -180.0(7) . . . . ?
C10 C8 O1 C6 120.5(6) . . . . ?
C7 C8 O1 C6 8.4(7) . . . . ?
C5 C6 O1 C8 9.7(7) . . . . ?
C5 C7 O2 C9 115.6(6) . . . . ?
C8 C7 O2 C9 2.8(7) . . . . ?
C10 C9 O2 C7 19.7(7) . . . . ?
C19 C20 O3 C22 17.6(7) . . . . ?
C23 C22 O3 C20 117.2(6) . . . . ?
C21 C22 O3 C20 7.7(7) . . . . ?
C22 C21 O4 C24 11.5(7) . . . . ?
C19 C21 O4 C24 123.3(6) . . . . ?
C23 C24 O4 C21 8.5(7) . . . . ?
 
_diffrn_measured_fraction_theta_max    0.994
_diffrn_reflns_theta_full              27.50
_diffrn_measured_fraction_theta_full   0.994
_refine_diff_density_max    1.810
_refine_diff_density_min   -0.905
_refine_diff_density_rms    0.135
# SQUEEZE RESULTS (APPEND TO CIF)
loop_
  _platon_squeeze_void_nr
  _platon_squeeze_void_average_x
  _platon_squeeze_void_average_y
  _platon_squeeze_void_average_z
  _platon_squeeze_void_volume
  _platon_squeeze_void_count_electrons
         1    -0.123     0.552     0.144     212.6      17.0
         2    -0.018     0.052     0.715     212.6      16.4
_platon_squeeze_details
;
P. van der Sluis & A.L. Spek, Acta Cryst. 1990, A46, 194
;
#===END
 
data_s92

_audit_creation_method            SHELXL-97 
_chemical_name_systematic 
; 
 ? 
; 
_chemical_name_common             ? 
_chemical_melting_point           ? 
_chemical_formula_moiety          'C14 H20 N4 O2, 2(F6 P)' 
_chemical_formula_sum 
 'C14 H20 F12 N4 O2 P2' 
_chemical_formula_weight          566.28 
 
loop_ 
 _atom_type_symbol 
 _atom_type_description 
 _atom_type_scat_dispersion_real 
 _atom_type_scat_dispersion_imag 
 _atom_type_scat_source 
 'C'  'C'   0.0033   0.0016 
 'International Tables Vol C Tables 4.2.6.8 and 6.1.1.4' 
 'H'  'H'   0.0000   0.0000 
 'International Tables Vol C Tables 4.2.6.8 and 6.1.1.4' 
 'N'  'N'   0.0061   0.0033 
 'International Tables Vol C Tables 4.2.6.8 and 6.1.1.4' 
 'O'  'O'   0.0106   0.0060 
 'International Tables Vol C Tables 4.2.6.8 and 6.1.1.4' 
 'F'  'F'   0.0171   0.0103 
 'International Tables Vol C Tables 4.2.6.8 and 6.1.1.4' 
 'P'  'P'   0.1023   0.0942 
 'International Tables Vol C Tables 4.2.6.8 and 6.1.1.4' 
 
_symmetry_cell_setting            Monoclinic
_symmetry_space_group_name_H-M    P2(1)
_symmetry_space_group_name_Hall    'P 2yb'
 
loop_ 
 _symmetry_equiv_pos_as_xyz 
 'x, y, z' 
 '-x, y+1/2, -z' 
 
_cell_length_a                    12.762(2) 
_cell_length_b                    11.951(2) 
_cell_length_c                    14.504(2) 
_cell_angle_alpha                 90.00 
_cell_angle_beta                  99.815(6) 
_cell_angle_gamma                 90.00 
_cell_volume                      2179.8(6) 
_cell_formula_units_Z             4 
_cell_measurement_temperature     150(2) 
_cell_measurement_reflns_used     ? 
_cell_measurement_theta_min       2.91 
_cell_measurement_theta_max       27.48 
 
_exptl_crystal_description        plate 
_exptl_crystal_colour             colorless 
_exptl_crystal_size_max           0.30 
_exptl_crystal_size_mid           0.20 
_exptl_crystal_size_min           0.04 
_exptl_crystal_density_meas       ? 
_exptl_crystal_density_diffrn     1.726 
_exptl_crystal_density_method     'not measured' 
_exptl_crystal_F_000              1144 
_exptl_absorpt_coefficient_mu     0.322 
_exptl_absorpt_correction_type    multi-scan 
_exptl_absorpt_correction_T_min   0.9096 
_exptl_absorpt_correction_T_max   0.9872 
_exptl_absorpt_process_details    'Sortav (Blessing, 1995)' 
 
_exptl_special_details 
; 
 ? 
; 
 
_diffrn_ambient_temperature       150(2)
_diffrn_radiation_wavelength      0.71073
_diffrn_radiation_type            MoK\a
_diffrn_radiation_source          'fine-focus sealed tube'
_diffrn_radiation_monochromator   graphite
_diffrn_measurement_device_type  'Bruker-Nonius KappaCCD'
_diffrn_measurement_method       '\f and \w'
_diffrn_detector_area_resol_mean ?
_diffrn_standards_number         0
_diffrn_standards_interval_count .
_diffrn_standards_interval_time  .
_diffrn_standards_decay_%        ?
_diffrn_reflns_number             9649 
_diffrn_reflns_av_R_equivalents   0.0942 
_diffrn_reflns_av_sigmaI/netI     0.1377 
_diffrn_reflns_limit_h_min        -15 
_diffrn_reflns_limit_h_max        14 
_diffrn_reflns_limit_k_min        -13 
_diffrn_reflns_limit_k_max        14 
_diffrn_reflns_limit_l_min        -17 
_diffrn_reflns_limit_l_max        17 
_diffrn_reflns_theta_min          3.03 
_diffrn_reflns_theta_max          25.52 
_reflns_number_total              6163 
_reflns_number_gt                 4484 
_reflns_threshold_expression      >2sigma(I) 
 
_computing_data_collection       'Collect (Nonius BV, 1997-2000)'
_computing_cell_refinement       'HKL Scalepack (Otwinowski & Minor, 1997)'
_computing_data_reduction        
'HKL Denzo and Scalepack (Otwinowski & Minor, 1997)'
_computing_structure_solution    'Dirdiff-99 (Beurskens, 1999)'
_computing_structure_refinement  'SHELXL-97 (Sheldrick, 1997)'
_computing_molecular_graphics    'X-Seed (Barbour, 2001)'
_computing_publication_material  'WinGX publication routines (Farrugia, 1999)' 
 
_refine_special_details 
; 
 Refinement of F^2^ against ALL reflections.  The weighted R-factor wR and 
 goodness of fit S are based on F^2^, conventional R-factors R are based 
 on F, with F set to zero for negative F^2^. The threshold expression of 
 F^2^ > 2sigma(F^2^) is used only for calculating R-factors(gt) etc. and is 
 not relevant to the choice of reflections for refinement.  R-factors based 
 on F^2^ are statistically about twice as large as those based on F, and R- 
 factors based on ALL data will be even larger. 
 
 Crystals were obtained as thin plates and we were only able to obtain a 
 limited amount of data. Due to a low data-to-parameter ratio, not all atoms 
 were refined anisotropically, specifically the fluorine atom F2 located 
 on a PF~6~ counterion.
; 
 
_refine_ls_structure_factor_coef  Fsqd  
_refine_ls_matrix_type            full 
_refine_ls_weighting_scheme       calc  
_refine_ls_weighting_details 
 'calc w=1/[\s^2^(Fo^2^)+(0.0550P)^2^+0.6746P] where P=(Fo^2^+2Fc^2^)/3' 
_atom_sites_solution_primary      direct 
_atom_sites_solution_secondary    difmap 
_atom_sites_solution_hydrogens    geom 
_refine_ls_hydrogen_treatment     constr 
_refine_ls_extinction_method      none 
_refine_ls_extinction_coef        ? 
_refine_ls_abs_structure_details 
 'Flack H D (1983), Acta Cryst. A39, 876-881' 
_refine_ls_abs_structure_Flack    -0.06(15) 
_refine_ls_number_reflns          6163 
_refine_ls_number_parameters      612 
_refine_ls_number_restraints      1 
_refine_ls_R_factor_all           0.1044 
_refine_ls_R_factor_gt            0.0689 
_refine_ls_wR_factor_ref          0.1723 
_refine_ls_wR_factor_gt           0.1483 
_refine_ls_goodness_of_fit_ref    1.075 
_refine_ls_restrained_S_all       1.075 
_refine_ls_shift/su_max           0.000 
_refine_ls_shift/su_mean          0.000 
 
loop_ 
 _atom_site_label 
 _atom_site_type_symbol 
 _atom_site_fract_x 
 _atom_site_fract_y 
 _atom_site_fract_z 
 _atom_site_U_iso_or_equiv 
 _atom_site_adp_type 
 _atom_site_occupancy 
 _atom_site_symmetry_multiplicity 
 _atom_site_calc_flag 
 _atom_site_refinement_flags 
 _atom_site_disorder_assembly 
 _atom_site_disorder_group 
P1 P 0.1289(2) 0.12919(18) 0.40406(13) 0.0459(6) Uani 1 1 d . . . 
F1 F 0.1465(6) 0.2130(5) 0.4888(3) 0.096(2) Uani 1 1 d . . . 
F2 F 0.2453(6) 0.0790(6) 0.4350(4) 0.0925(19) Uiso 1 1 d . . . 
F3 F 0.1071(5) 0.0461(4) 0.3176(3) 0.0648(16) Uani 1 1 d . . . 
F4 F 0.0081(6) 0.1764(5) 0.3713(4) 0.090(2) Uani 1 1 d . . . 
F5 F 0.0808(5) 0.0385(4) 0.4649(3) 0.0645(17) Uani 1 1 d . . . 
F6 F 0.1711(6) 0.2211(5) 0.3413(4) 0.086(2) Uani 1 1 d . . . 
P2 P 0.4696(2) 0.19928(19) 0.96499(14) 0.0460(6) Uani 1 1 d . . . 
F7 F 0.5883(5) 0.2183(5) 1.0159(4) 0.0803(19) Uani 1 1 d . . . 
F8 F 0.4487(6) 0.3300(5) 0.9651(5) 0.093(2) Uani 1 1 d . . . 
F9 F 0.3513(5) 0.1794(5) 0.9090(4) 0.089(2) Uani 1 1 d . . . 
F10 F 0.4889(5) 0.0680(4) 0.9610(4) 0.0747(17) Uani 1 1 d . . . 
F11 F 0.4297(6) 0.1846(6) 1.0608(4) 0.094(2) Uani 1 1 d . . . 
F12 F 0.5053(6) 0.2141(6) 0.8675(3) 0.086(2) Uani 1 1 d . . . 
P3 P 0.4099(2) -0.25717(16) 0.63253(13) 0.0400(5) Uani 1 1 d . . . 
F13 F 0.4035(4) -0.1701(4) 0.7134(3) 0.0525(13) Uani 1 1 d . . . 
F14 F 0.5330(4) -0.2291(5) 0.6351(3) 0.0650(15) Uani 1 1 d . . . 
F15 F 0.4153(4) -0.3451(3) 0.5487(3) 0.0515(14) Uani 1 1 d . . . 
F16 F 0.2865(4) -0.2885(4) 0.6266(3) 0.0449(12) Uani 1 1 d . . . 
F17 F 0.4407(4) -0.3550(4) 0.7063(3) 0.0581(15) Uani 1 1 d . . . 
F18 F 0.3766(4) -0.1618(4) 0.5556(3) 0.0549(14) Uani 1 1 d . . . 
P4 P -0.13854(18) 0.19068(17) 0.85560(11) 0.0373(5) Uani 1 1 d . . . 
F19 F -0.1116(4) 0.2946(4) 0.9243(3) 0.0543(14) Uani 1 1 d . . . 
F20 F -0.0221(4) 0.2015(4) 0.8267(3) 0.0530(12) Uani 1 1 d . . . 
F21 F -0.1855(5) 0.2728(4) 0.7741(3) 0.0729(19) Uani 1 1 d . . . 
F22 F -0.1631(4) 0.0862(4) 0.7869(3) 0.0522(13) Uani 1 1 d . . . 
F23 F -0.2507(5) 0.1792(5) 0.8866(3) 0.0690(15) Uani 1 1 d . . . 
F24 F -0.0866(5) 0.1085(4) 0.9381(3) 0.0564(14) Uani 1 1 d . . . 
O1 O 0.1177(5) 0.3384(4) 0.7238(3) 0.0409(14) Uani 1 1 d . . . 
O2 O 0.2337(5) 0.5530(4) 0.8272(3) 0.0417(14) Uani 1 1 d . . . 
N1 N 0.4065(6) 0.2083(5) 0.6357(4) 0.0432(17) Uani 1 1 d . . . 
N2 N 0.3319(6) 0.3636(5) 0.6603(3) 0.0361(16) Uani 1 1 d . . . 
N3 N 0.1659(6) 0.4041(5) 0.9768(4) 0.0353(16) Uani 1 1 d . . . 
N4 N 0.2750(6) 0.4060(6) 1.1062(4) 0.0442(19) Uani 1 1 d . . . 
C1 C 0.4342(9) 0.0876(7) 0.6351(6) 0.056(3) Uani 1 1 d . . . 
H1A H 0.4064 0.0492 0.6856 0.084 Uiso 1 1 calc R . . 
H1B H 0.5116 0.0792 0.6444 0.084 Uiso 1 1 calc R . . 
H1C H 0.4026 0.0547 0.5748 0.084 Uiso 1 1 calc R . . 
C2 C 0.4554(9) 0.2896(7) 0.5923(5) 0.057(3) Uani 1 1 d . . . 
H2 H 0.5117 0.2794 0.5580 0.068 Uiso 1 1 calc R . . 
C3 C 0.4082(8) 0.3875(7) 0.6077(5) 0.050(2) Uani 1 1 d . . . 
H3 H 0.4250 0.4592 0.5860 0.060 Uiso 1 1 calc R . . 
C4 C 0.3312(7) 0.2531(6) 0.6766(5) 0.040(2) Uani 1 1 d . . . 
H4 H 0.2855 0.2143 0.7109 0.048 Uiso 1 1 calc R . . 
C5 C 0.2578(7) 0.4481(6) 0.6901(4) 0.039(2) Uani 1 1 d . . . 
H5 H 0.2735 0.5245 0.6679 0.047 Uiso 1 1 calc R . . 
C6 C 0.2661(7) 0.4468(6) 0.7958(4) 0.040(2) Uani 1 1 d . . . 
H6 H 0.3386 0.4245 0.8283 0.048 Uiso 1 1 calc R . . 
C7 C 0.1802(7) 0.3638(6) 0.8133(4) 0.035(2) Uani 1 1 d . . . 
H7 H 0.2132 0.2943 0.8439 0.042 Uiso 1 1 calc R . . 
C8 C 0.1450(7) 0.4180(6) 0.6563(4) 0.036(2) Uani 1 1 d . . . 
H8A H 0.0990 0.4851 0.6534 0.043 Uiso 1 1 calc R . . 
H8B H 0.1364 0.3839 0.5933 0.043 Uiso 1 1 calc R . . 
C9 C 0.1169(7) 0.4242(6) 0.8774(4) 0.0336(19) Uani 1 1 d . . . 
H9 H 0.0406 0.4006 0.8651 0.040 Uiso 1 1 calc R . . 
C10 C 0.1290(8) 0.5457(6) 0.8501(5) 0.043(2) Uani 1 1 d . . . 
H10A H 0.0746 0.5660 0.7955 0.052 Uiso 1 1 calc R . . 
H10B H 0.1218 0.5961 0.9028 0.052 Uiso 1 1 calc R . . 
C11 C 0.1235(8) 0.3407(7) 1.0382(4) 0.042(2) Uani 1 1 d . . . 
H11 H 0.0573 0.3026 1.0258 0.051 Uiso 1 1 calc R . . 
C12 C 0.1916(9) 0.3410(7) 1.1204(5) 0.050(3) Uani 1 1 d . . . 
H12 H 0.1832 0.3036 1.1764 0.060 Uiso 1 1 calc R . . 
C13 C 0.2606(7) 0.4453(6) 1.0191(5) 0.039(2) Uani 1 1 d . . . 
H13 H 0.3072 0.4925 0.9922 0.047 Uiso 1 1 calc R . . 
C14 C 0.3730(9) 0.4309(8) 1.1779(5) 0.067(3) Uani 1 1 d . . . 
H14A H 0.4305 0.3800 1.1686 0.101 Uiso 1 1 calc R . . 
H14B H 0.3566 0.4204 1.2410 0.101 Uiso 1 1 calc R . . 
H14C H 0.3954 0.5084 1.1707 0.101 Uiso 1 1 calc R . . 
O3 O 0.2081(5) 0.0385(4) 0.7418(3) 0.0426(14) Uani 1 1 d . . . 
O4 O 0.0906(5) -0.1626(4) 0.8464(3) 0.0390(14) Uani 1 1 d . . . 
N5 N -0.1003(6) 0.1638(5) 0.5898(3) 0.0372(17) Uani 1 1 d . . . 
N6 N -0.0229(6) 0.0101(5) 0.6438(3) 0.0352(16) Uani 1 1 d . . . 
N7 N 0.2408(6) -0.0236(5) 0.9913(4) 0.0374(17) Uani 1 1 d . . . 
N8 N 0.2888(6) -0.0117(6) 1.1418(4) 0.0448(19) Uani 1 1 d . . . 
C15 C -0.1182(9) 0.2832(6) 0.5690(5) 0.047(2) Uani 1 1 d . . . 
H15A H -0.0894 0.3275 0.6244 0.070 Uiso 1 1 calc R . . 
H15B H -0.1947 0.2973 0.5518 0.070 Uiso 1 1 calc R . . 
H15C H -0.0824 0.3044 0.5170 0.070 Uiso 1 1 calc R . . 
C16 C -0.1728(8) 0.0769(6) 0.5647(4) 0.045(2) Uani 1 1 d . . . 
H16 H -0.2426 0.0841 0.5298 0.054 Uiso 1 1 calc R . . 
C17 C -0.1259(7) -0.0184(6) 0.5988(4) 0.042(2) Uani 1 1 d . . . 
H17 H -0.1564 -0.0911 0.5936 0.051 Uiso 1 1 calc R . . 
C18 C -0.0116(7) 0.1198(6) 0.6387(4) 0.036(2) Uani 1 1 d . . . 
H18 H 0.0498 0.1608 0.6656 0.044 Uiso 1 1 calc R . . 
C19 C 0.0551(7) -0.0700(6) 0.6935(4) 0.035(2) Uani 1 1 d . . . 
H19 H 0.0339 -0.1483 0.6744 0.042 Uiso 1 1 calc R . . 
C20 C 0.0666(7) -0.0578(5) 0.7991(4) 0.0315(19) Uani 1 1 d . . . 
H20 H 0.0027 -0.0214 0.8177 0.038 Uiso 1 1 calc R . . 
C21 C 0.1694(7) 0.0173(6) 0.8256(4) 0.034(2) Uani 1 1 d . . . 
H21 H 0.1521 0.0888 0.8554 0.041 Uiso 1 1 calc R . . 
C22 C 0.1660(8) -0.0455(7) 0.6736(5) 0.046(2) Uani 1 1 d . . . 
H22A H 0.2106 -0.1138 0.6814 0.056 Uiso 1 1 calc R . . 
H22B H 0.1628 -0.0168 0.6092 0.056 Uiso 1 1 calc R . . 
C23 C 0.2471(7) -0.0552(6) 0.8958(4) 0.0325(19) Uani 1 1 d . . . 
H23 H 0.3216 -0.0478 0.8836 0.039 Uiso 1 1 calc R . . 
C24 C 0.2052(7) -0.1747(6) 0.8742(5) 0.0359(19) Uani 1 1 d . . . 
H24A H 0.2371 -0.2080 0.8229 0.043 Uiso 1 1 calc R . . 
H24B H 0.2222 -0.2229 0.9302 0.043 Uiso 1 1 calc R . . 
C25 C 0.1618(8) 0.0288(7) 1.0272(5) 0.044(2) Uani 1 1 d . . . 
H25 H 0.0964 0.0547 0.9925 0.052 Uiso 1 1 calc R . . 
C26 C 0.1921(8) 0.0375(7) 1.1185(5) 0.044(2) Uani 1 1 d . . . 
H26 H 0.1529 0.0722 1.1607 0.053 Uiso 1 1 calc R . . 
C27 C 0.3201(7) -0.0489(6) 1.0639(5) 0.040(2) Uani 1 1 d . . . 
H27 H 0.3850 -0.0859 1.0598 0.048 Uiso 1 1 calc R . . 
C28 C 0.3559(9) -0.0210(9) 1.2362(5) 0.066(3) Uani 1 1 d . . . 
H28A H 0.4028 -0.0862 1.2377 0.100 Uiso 1 1 calc R . . 
H28B H 0.3102 -0.0298 1.2835 0.100 Uiso 1 1 calc R . . 
H28C H 0.3990 0.0468 1.2494 0.100 Uiso 1 1 calc R . . 
 
loop_ 
 _atom_site_aniso_label 
 _atom_site_aniso_U_11 
 _atom_site_aniso_U_22 
 _atom_site_aniso_U_33 
 _atom_site_aniso_U_23 
 _atom_site_aniso_U_13 
 _atom_site_aniso_U_12 
P1 0.0669(18) 0.0351(11) 0.0314(9) 0.0004(8) -0.0041(10) 0.0033(11) 
F1 0.155(7) 0.066(4) 0.071(3) -0.045(3) 0.029(4) -0.037(4) 
F3 0.092(5) 0.060(3) 0.041(2) -0.014(2) 0.010(2) -0.010(3) 
F4 0.086(5) 0.070(4) 0.110(4) 0.029(3) 0.007(4) 0.016(4) 
F5 0.105(5) 0.048(3) 0.038(2) 0.010(2) 0.005(2) -0.005(3) 
F6 0.126(6) 0.064(4) 0.078(3) 0.014(3) 0.041(4) -0.021(4) 
P2 0.0422(15) 0.0403(11) 0.0508(11) -0.0013(10) -0.0053(10) -0.0016(11) 
F7 0.042(4) 0.097(5) 0.090(3) 0.024(3) -0.023(3) -0.013(3) 
F8 0.079(5) 0.051(3) 0.147(5) -0.011(3) 0.014(4) -0.004(3) 
F9 0.048(4) 0.067(4) 0.133(5) 0.028(4) -0.035(4) -0.014(3) 
F10 0.073(5) 0.041(3) 0.109(4) 0.000(3) 0.013(3) 0.012(3) 
F11 0.110(6) 0.107(5) 0.075(3) -0.010(4) 0.040(3) -0.023(5) 
F12 0.094(5) 0.108(5) 0.056(3) 0.002(3) 0.008(3) 0.000(4) 
P3 0.0458(15) 0.0325(10) 0.0386(10) -0.0023(8) -0.0016(9) 0.0010(10) 
F13 0.058(4) 0.044(3) 0.051(2) -0.013(2) -0.006(2) -0.001(2) 
F14 0.044(4) 0.076(4) 0.073(3) -0.022(3) 0.003(3) -0.007(3) 
F15 0.068(4) 0.038(3) 0.045(2) -0.0094(18) 0.002(2) 0.000(2) 
F16 0.037(3) 0.042(3) 0.053(2) 0.007(2) -0.001(2) -0.001(2) 
F17 0.068(4) 0.051(3) 0.048(2) 0.008(2) -0.009(2) 0.014(3) 
F18 0.078(4) 0.033(2) 0.048(2) 0.0084(19) -0.002(2) -0.001(3) 
P4 0.0454(15) 0.0327(10) 0.0316(9) 0.0004(8) 0.0001(9) 0.0030(10) 
F19 0.061(4) 0.045(3) 0.055(3) -0.015(2) 0.006(2) 0.001(2) 
F20 0.058(4) 0.041(3) 0.065(3) -0.006(2) 0.024(2) -0.002(2) 
F21 0.104(5) 0.056(3) 0.051(3) 0.010(2) -0.007(3) 0.030(3) 
F22 0.054(4) 0.047(3) 0.050(2) -0.020(2) -0.004(2) -0.003(2) 
F23 0.051(4) 0.073(4) 0.083(3) -0.014(3) 0.011(3) -0.002(3) 
F24 0.071(4) 0.054(3) 0.041(2) 0.015(2) 0.000(2) 0.005(3) 
O1 0.051(4) 0.041(3) 0.027(2) -0.004(2) -0.004(2) -0.011(3) 
O2 0.057(5) 0.028(3) 0.040(3) -0.006(2) 0.009(3) -0.010(3) 
N1 0.052(5) 0.032(4) 0.043(3) 0.001(3) 0.000(3) 0.007(3) 
N2 0.045(5) 0.035(4) 0.028(3) 0.003(2) 0.006(3) -0.006(3) 
N3 0.044(5) 0.025(3) 0.032(3) 0.001(3) -0.007(3) 0.001(3) 
N4 0.051(6) 0.046(4) 0.032(3) 0.003(3) -0.005(3) 0.008(4) 
C1 0.068(8) 0.036(5) 0.064(5) 0.001(4) 0.012(5) 0.007(4) 
C2 0.084(9) 0.046(5) 0.045(4) 0.000(4) 0.024(5) 0.007(5) 
C3 0.069(8) 0.033(4) 0.048(4) 0.001(4) 0.010(5) -0.001(4) 
C4 0.047(6) 0.031(4) 0.038(4) 0.006(3) 0.002(4) 0.000(4) 
C5 0.053(6) 0.032(4) 0.034(3) -0.005(3) 0.008(4) 0.004(4) 
C6 0.058(7) 0.024(4) 0.034(4) -0.006(3) 0.001(4) -0.009(4) 
C7 0.045(6) 0.029(4) 0.027(3) -0.005(3) -0.007(3) 0.008(3) 
C8 0.046(6) 0.034(4) 0.023(3) 0.000(3) -0.005(3) 0.002(4) 
C9 0.046(6) 0.035(4) 0.015(3) 0.002(3) -0.007(3) 0.000(4) 
C10 0.065(7) 0.028(4) 0.037(4) 0.003(3) 0.008(4) 0.006(4) 
C11 0.060(7) 0.038(4) 0.029(4) 0.002(3) 0.006(4) -0.004(4) 
C12 0.085(8) 0.041(5) 0.025(4) 0.010(3) 0.011(4) 0.008(5) 
C13 0.043(6) 0.043(4) 0.029(3) 0.001(3) -0.001(3) 0.004(4) 
C14 0.063(8) 0.077(7) 0.048(5) -0.009(4) -0.031(5) 0.003(6) 
O3 0.055(4) 0.043(3) 0.027(2) 0.005(2) -0.001(2) -0.004(3) 
O4 0.045(4) 0.037(3) 0.032(2) 0.003(2) -0.004(2) -0.004(3) 
N5 0.043(5) 0.037(4) 0.027(3) 0.001(3) -0.007(3) 0.005(3) 
N6 0.046(5) 0.029(3) 0.028(3) 0.000(2) -0.004(3) 0.006(3) 
N7 0.047(5) 0.031(3) 0.030(3) 0.002(3) -0.005(3) 0.002(3) 
N8 0.054(6) 0.048(4) 0.027(3) -0.003(3) -0.008(3) -0.011(4) 
C15 0.070(7) 0.024(4) 0.039(4) 0.001(3) -0.010(4) 0.005(4) 
C16 0.064(7) 0.034(4) 0.031(4) -0.011(3) -0.007(4) 0.001(4) 
C17 0.049(6) 0.037(4) 0.033(4) 0.003(3) -0.016(4) 0.001(4) 
C18 0.050(6) 0.028(4) 0.028(3) 0.004(3) -0.001(3) -0.005(4) 
C19 0.044(6) 0.024(4) 0.034(4) -0.001(3) -0.005(3) 0.002(4) 
C20 0.044(6) 0.027(4) 0.021(3) 0.006(3) -0.002(3) 0.005(3) 
C21 0.040(6) 0.030(4) 0.027(3) -0.001(3) -0.008(3) 0.005(3) 
C22 0.064(7) 0.040(5) 0.031(4) -0.008(3) -0.002(4) 0.010(4) 
C23 0.040(5) 0.031(4) 0.024(3) 0.001(3) -0.002(3) 0.006(3) 
C24 0.036(6) 0.036(4) 0.033(4) -0.007(3) -0.001(3) 0.003(4) 
C25 0.050(7) 0.042(5) 0.035(4) 0.001(3) -0.004(4) 0.004(4) 
C26 0.050(7) 0.045(5) 0.038(4) 0.000(4) 0.009(4) 0.004(4) 
C27 0.036(6) 0.037(4) 0.039(4) -0.002(3) -0.016(4) -0.005(4) 
C28 0.071(8) 0.094(8) 0.024(4) 0.010(4) -0.019(4) -0.017(6) 
 
_geom_special_details 
; 
 All esds (except the esd in the dihedral angle between two l.s. planes) 
 are estimated using the full covariance matrix.  The cell esds are taken 
 into account individually in the estimation of esds in distances, angles 
 and torsion angles; correlations between esds in cell parameters are only 
 used when they are defined by crystal symmetry.  An approximate (isotropic) 
 treatment of cell esds is used for estimating esds involving l.s. planes. 
; 
 
loop_ 
 _geom_bond_atom_site_label_1 
 _geom_bond_atom_site_label_2 
 _geom_bond_distance 
 _geom_bond_site_symmetry_2 
 _geom_bond_publ_flag 
P1 F1 1.572(5) . ? 
P1 F6 1.579(6) . ? 
P1 F5 1.585(6) . ? 
P1 F3 1.587(5) . ? 
P1 F2 1.594(8) . ? 
P1 F4 1.635(7) . ? 
P2 F12 1.567(6) . ? 
P2 F11 1.569(6) . ? 
P2 F7 1.584(6) . ? 
P2 F8 1.586(7) . ? 
P2 F10 1.591(6) . ? 
P2 F9 1.606(6) . ? 
P3 F13 1.580(5) . ? 
P3 F17 1.589(5) . ? 
P3 F18 1.601(4) . ? 
P3 F14 1.601(6) . ? 
P3 F16 1.607(5) . ? 
P3 F15 1.618(4) . ? 
P4 F21 1.574(4) . ? 
P4 F23 1.578(6) . ? 
P4 F19 1.593(5) . ? 
P4 F22 1.595(4) . ? 
P4 F24 1.602(4) . ? 
P4 F20 1.616(6) . ? 
O1 C7 1.436(7) . ? 
O1 C8 1.449(9) . ? 
O2 C10 1.433(11) . ? 
O2 C6 1.434(9) . ? 
N1 C4 1.325(11) . ? 
N1 C2 1.365(12) . ? 
N1 C1 1.486(10) . ? 
N2 C4 1.343(10) . ? 
N2 C3 1.366(12) . ? 
N2 C5 1.497(10) . ? 
N3 C11 1.351(10) . ? 
N3 C13 1.352(11) . ? 
N3 C9 1.490(7) . ? 
N4 C13 1.331(9) . ? 
N4 C12 1.361(13) . ? 
N4 C14 1.514(10) . ? 
C2 C3 1.351(13) . ? 
C5 C8 1.484(12) . ? 
C5 C6 1.518(9) . ? 
C6 C7 1.531(12) . ? 
C7 C9 1.514(11) . ? 
C9 C10 1.519(10) . ? 
C11 C12 1.350(10) . ? 
O3 C21 1.411(10) . ? 
O3 C22 1.447(8) . ? 
O4 C20 1.436(8) . ? 
O4 C24 1.456(10) . ? 
N5 C18 1.337(10) . ? 
N5 C16 1.397(10) . ? 
N5 C15 1.468(9) . ? 
N6 C18 1.322(9) . ? 
N6 C17 1.406(11) . ? 
N6 C19 1.477(9) . ? 
N7 C25 1.363(11) . ? 
N7 C27 1.364(9) . ? 
N7 C23 1.451(9) . ? 
N8 C27 1.338(10) . ? 
N8 C26 1.356(12) . ? 
N8 C28 1.490(8) . ? 
C16 C17 1.342(10) . ? 
C19 C22 1.520(13) . ? 
C19 C20 1.521(8) . ? 
C20 C21 1.582(11) . ? 
C21 C23 1.557(9) . ? 
C23 C24 1.538(10) . ? 
C25 C26 1.319(10) . ? 
 
loop_ 
 _geom_angle_atom_site_label_1 
 _geom_angle_atom_site_label_2 
 _geom_angle_atom_site_label_3 
 _geom_angle 
 _geom_angle_site_symmetry_1 
 _geom_angle_site_symmetry_3 
 _geom_angle_publ_flag 
F1 P1 F6 89.4(3) . . ? 
F1 P1 F5 91.0(3) . . ? 
F6 P1 F5 177.2(4) . . ? 
F1 P1 F3 178.1(4) . . ? 
F6 P1 F3 90.6(3) . . ? 
F5 P1 F3 88.9(3) . . ? 
F1 P1 F2 91.0(4) . . ? 
F6 P1 F2 91.8(4) . . ? 
F5 P1 F2 91.0(3) . . ? 
F3 P1 F2 90.9(3) . . ? 
F1 P1 F4 90.6(4) . . ? 
F6 P1 F4 89.4(4) . . ? 
F5 P1 F4 87.8(3) . . ? 
F3 P1 F4 87.5(3) . . ? 
F2 P1 F4 178.0(4) . . ? 
F12 P2 F11 178.0(4) . . ? 
F12 P2 F7 90.1(4) . . ? 
F11 P2 F7 91.9(4) . . ? 
F12 P2 F8 88.0(4) . . ? 
F11 P2 F8 91.7(4) . . ? 
F7 P2 F8 90.4(4) . . ? 
F12 P2 F10 90.4(4) . . ? 
F11 P2 F10 89.9(4) . . ? 
F7 P2 F10 90.9(3) . . ? 
F8 P2 F10 177.9(3) . . ? 
F12 P2 F9 87.3(4) . . ? 
F11 P2 F9 90.7(4) . . ? 
F7 P2 F9 177.4(4) . . ? 
F8 P2 F9 90.1(4) . . ? 
F10 P2 F9 88.5(3) . . ? 
F13 P3 F17 91.3(2) . . ? 
F13 P3 F18 90.4(2) . . ? 
F17 P3 F18 177.9(3) . . ? 
F13 P3 F14 91.1(3) . . ? 
F17 P3 F14 90.5(3) . . ? 
F18 P3 F14 90.6(3) . . ? 
F13 P3 F16 91.1(3) . . ? 
F17 P3 F16 89.6(3) . . ? 
F18 P3 F16 89.3(3) . . ? 
F14 P3 F16 177.8(3) . . ? 
F13 P3 F15 179.1(3) . . ? 
F17 P3 F15 89.5(2) . . ? 
F18 P3 F15 88.8(2) . . ? 
F14 P3 F15 89.2(3) . . ? 
F16 P3 F15 88.6(3) . . ? 
F21 P4 F23 91.2(4) . . ? 
F21 P4 F19 89.9(3) . . ? 
F23 P4 F19 89.9(3) . . ? 
F21 P4 F22 90.5(2) . . ? 
F23 P4 F22 91.1(3) . . ? 
F19 P4 F22 178.9(3) . . ? 
F21 P4 F24 177.9(4) . . ? 
F23 P4 F24 90.8(3) . . ? 
F19 P4 F24 89.6(2) . . ? 
F22 P4 F24 90.0(3) . . ? 
F21 P4 F20 90.2(3) . . ? 
F23 P4 F20 178.4(3) . . ? 
F19 P4 F20 89.4(3) . . ? 
F22 P4 F20 89.5(3) . . ? 
F24 P4 F20 87.8(3) . . ? 
C7 O1 C8 108.2(5) . . ? 
C10 O2 C6 110.5(6) . . ? 
C4 N1 C2 110.0(7) . . ? 
C4 N1 C1 125.9(8) . . ? 
C2 N1 C1 124.1(8) . . ? 
C4 N2 C3 109.3(7) . . ? 
C4 N2 C5 126.1(7) . . ? 
C3 N2 C5 124.5(6) . . ? 
C11 N3 C13 109.4(6) . . ? 
C11 N3 C9 125.4(7) . . ? 
C13 N3 C9 125.1(7) . . ? 
C13 N4 C12 111.1(7) . . ? 
C13 N4 C14 123.1(8) . . ? 
C12 N4 C14 125.7(7) . . ? 
C3 C2 N1 106.8(9) . . ? 
C2 C3 N2 106.9(8) . . ? 
N1 C4 N2 106.9(7) . . ? 
C8 C5 N2 111.5(6) . . ? 
C8 C5 C6 103.2(7) . . ? 
N2 C5 C6 110.2(6) . . ? 
O2 C6 C5 109.7(6) . . ? 
O2 C6 C7 105.5(7) . . ? 
C5 C6 C7 104.2(6) . . ? 
O1 C7 C9 112.6(6) . . ? 
O1 C7 C6 106.8(5) . . ? 
C9 C7 C6 105.4(6) . . ? 
O1 C8 C5 105.5(5) . . ? 
N3 C9 C7 109.7(6) . . ? 
N3 C9 C10 111.2(5) . . ? 
C7 C9 C10 102.0(6) . . ? 
O2 C10 C9 105.0(7) . . ? 
C12 C11 N3 108.1(8) . . ? 
C11 C12 N4 105.7(7) . . ? 
N4 C13 N3 105.6(8) . . ? 
C21 O3 C22 108.6(6) . . ? 
C20 O4 C24 110.0(6) . . ? 
C18 N5 C16 108.0(6) . . ? 
C18 N5 C15 125.4(7) . . ? 
C16 N5 C15 126.5(7) . . ? 
C18 N6 C17 108.5(6) . . ? 
C18 N6 C19 126.7(6) . . ? 
C17 N6 C19 124.7(6) . . ? 
C25 N7 C27 107.9(6) . . ? 
C25 N7 C23 130.5(6) . . ? 
C27 N7 C23 121.6(7) . . ? 
C27 N8 C26 108.9(6) . . ? 
C27 N8 C28 122.9(8) . . ? 
C26 N8 C28 128.2(8) . . ? 
C17 C16 N5 107.5(7) . . ? 
C16 C17 N6 106.8(7) . . ? 
N6 C18 N5 109.2(7) . . ? 
N6 C19 C22 110.8(6) . . ? 
N6 C19 C20 111.8(6) . . ? 
C22 C19 C20 103.9(6) . . ? 
O4 C20 C19 111.9(5) . . ? 
O4 C20 C21 106.1(5) . . ? 
C19 C20 C21 103.4(6) . . ? 
O3 C21 C23 112.7(7) . . ? 
O3 C21 C20 106.9(5) . . ? 
C23 C21 C20 104.6(6) . . ? 
O3 C22 C19 104.6(6) . . ? 
N7 C23 C24 111.2(6) . . ? 
N7 C23 C21 110.3(6) . . ? 
C24 C23 C21 102.9(5) . . ? 
O4 C24 C23 105.2(6) . . ? 
C26 C25 N7 108.1(8) . . ? 
C25 C26 N8 108.4(8) . . ? 
N8 C27 N7 106.8(8) . . ? 
 
_diffrn_measured_fraction_theta_max    0.868 
_diffrn_reflns_theta_full              25.52 
_diffrn_measured_fraction_theta_full   0.868 
_refine_diff_density_max    0.332 
_refine_diff_density_min   -0.451 
_refine_diff_density_rms    0.084 
_chemical_absolute_configuration rm

# start Validation Reply Form
_vrf_PLAT029_data_s92
;
PROBLEM: _diffrn_measured_fraction_theta_full Low .......       0.87       
RESPONSE: Poor crystal quality. Limited data.
;

# end Validation Reply Form

data_ad1001a
 
_audit_creation_method            SHELXL-97
_chemical_name_systematic
;
 ?
;
_chemical_name_common             ?
_chemical_melting_point           ?
_chemical_formula_moiety          'C14 H18 Au2 Cl2 N4 O2'
_chemical_formula_sum
 'C14 H18 Au2 Cl2 N4 O2'
_chemical_formula_weight          739.16
 
loop_
 _atom_type_symbol
 _atom_type_description
 _atom_type_scat_dispersion_real
 _atom_type_scat_dispersion_imag
 _atom_type_scat_source
 'C'  'C'   0.0033   0.0016
 'International Tables Vol C Tables 4.2.6.8 and 6.1.1.4'
 'H'  'H'   0.0000   0.0000
 'International Tables Vol C Tables 4.2.6.8 and 6.1.1.4'
 'N'  'N'   0.0061   0.0033
 'International Tables Vol C Tables 4.2.6.8 and 6.1.1.4'
 'O'  'O'   0.0106   0.0060
 'International Tables Vol C Tables 4.2.6.8 and 6.1.1.4'
 'Au'  'Au'  -2.0133   8.8022
 'International Tables Vol C Tables 4.2.6.8 and 6.1.1.4'
 'Cl'  'Cl'   0.1484   0.1585
 'International Tables Vol C Tables 4.2.6.8 and 6.1.1.4'
 
_symmetry_cell_setting            monoclinic
_symmetry_space_group_name_H-M    'P 21'
_symmetry_space_group_name_Hall    'P 2yb'
 
loop_
 _symmetry_equiv_pos_as_xyz
 'x, y, z'
 '-x, y+1/2, -z'
 
_cell_length_a                    8.3312(3)
_cell_length_b                    12.6030(4)
_cell_length_c                    9.4992(4)
_cell_angle_alpha                 90.00
_cell_angle_beta                  114.071(2)
_cell_angle_gamma                 90.00
_cell_volume                      910.66(6)
_cell_formula_units_Z             2
_cell_measurement_temperature     150(2)
_cell_measurement_reflns_used     1776
_cell_measurement_theta_min        0.998
_cell_measurement_theta_max        27.485
 
_exptl_crystal_description        needle
_exptl_crystal_colour             colourless
_exptl_crystal_size_max           0.45
_exptl_crystal_size_mid           0.03
_exptl_crystal_size_min           0.02
_exptl_crystal_density_meas       ?
_exptl_crystal_density_diffrn     2.696
_exptl_crystal_density_method     'not measured'
_exptl_crystal_F_000              676
_exptl_absorpt_coefficient_mu     16.399
_exptl_absorpt_correction_type    empirical
_exptl_absorpt_correction_T_min   0.0508
_exptl_absorpt_correction_T_max   0.7351
_exptl_absorpt_process_details    'Sortav (Blessing, 1995)'
 
_exptl_special_details
;
 ?
;
 
_diffrn_ambient_temperature       150(2)
_diffrn_radiation_wavelength      0.71073
_diffrn_radiation_type            MoK\a
_diffrn_radiation_source          'fine-focus sealed tube'
_diffrn_radiation_monochromator   graphite
_diffrn_measurement_device_type   KappaCCD
_diffrn_measurement_method        CCD
_diffrn_detector_area_resol_mean  9
_diffrn_standards_number          ?
_diffrn_standards_interval_count  ?
_diffrn_standards_interval_time   ?
_diffrn_standards_decay_%         ?
_diffrn_reflns_number             5974
_diffrn_reflns_av_R_equivalents   0.0475
_diffrn_reflns_av_sigmaI/netI     0.0581
_diffrn_reflns_limit_h_min        -9
_diffrn_reflns_limit_h_max        10
_diffrn_reflns_limit_k_min        -16
_diffrn_reflns_limit_k_max        15
_diffrn_reflns_limit_l_min        -9
_diffrn_reflns_limit_l_max        12
_diffrn_reflns_theta_min          2.35
_diffrn_reflns_theta_max          27.47
_reflns_number_total              3742
_reflns_number_gt                 3436
_reflns_threshold_expression      >2sigma(I)
 
_computing_data_collection        'Collect (Nonius, 2000)'
_computing_cell_refinement        'HKL Scalepack (Otwinowski & Minor 1997)'
_computing_data_reduction        
 'HKL Denzo and Scalepack (Otwinowski & Minor 1997)'
_computing_structure_solution     'SIR92 (Giacovazzo et al, 1993)'
_computing_structure_refinement   'SHELXL-97 (Sheldrick, 2008)'
_computing_molecular_graphics     'X-SEED (Barbour, 2001)'
_computing_publication_material   'WinGX publication routines (Farrugia, 1999)'
 
_refine_special_details
;
 Refinement of F^2^ against ALL reflections.  The weighted R-factor wR and
 goodness of fit S are based on F^2^, conventional R-factors R are based
 on F, with F set to zero for negative F^2^. The threshold expression of
 F^2^ > 2sigma(F^2^) is used only for calculating R-factors(gt) etc. and is
 not relevant to the choice of reflections for refinement.  R-factors based
 on F^2^ are statistically about twice as large as those based on F, and R-
 factors based on ALL data will be even larger.
;
 
_refine_ls_structure_factor_coef  Fsqd
_refine_ls_matrix_type            full
_refine_ls_weighting_scheme       calc
_refine_ls_weighting_details
 'calc w=1/[\s^2^(Fo^2^)+(0.0238P)^2^+10.6469P] where P=(Fo^2^+2Fc^2^)/3'
_atom_sites_solution_primary      direct
_atom_sites_solution_secondary    difmap
_atom_sites_solution_hydrogens    geom
_refine_ls_hydrogen_treatment     constr
_refine_ls_extinction_method      SHELXL
_refine_ls_extinction_coef        0.0016(2)
_refine_ls_extinction_expression
 'Fc^*^=kFc[1+0.001xFc^2^\l^3^/sin(2\q)]^-1/4^'
_refine_ls_abs_structure_details
 'Flack H D (1983), Acta Cryst. A39, 876-881'
_refine_ls_abs_structure_Flack    -0.018(16)
_refine_ls_number_reflns          3742
_refine_ls_number_parameters      220
_refine_ls_number_restraints      7
_refine_ls_R_factor_all           0.0444
_refine_ls_R_factor_gt            0.0371
_refine_ls_wR_factor_ref          0.0853
_refine_ls_wR_factor_gt           0.0818
_refine_ls_goodness_of_fit_ref    1.045
_refine_ls_restrained_S_all       1.044
_refine_ls_shift/su_max           0.001
_refine_ls_shift/su_mean          0.000
 
loop_
 _atom_site_label
 _atom_site_type_symbol
 _atom_site_fract_x
 _atom_site_fract_y
 _atom_site_fract_z
 _atom_site_U_iso_or_equiv
 _atom_site_adp_type
 _atom_site_occupancy
 _atom_site_symmetry_multiplicity
 _atom_site_calc_flag
 _atom_site_refinement_flags
 _atom_site_disorder_assembly
 _atom_site_disorder_group
C1 C 0.7695(18) 0.4892(10) 0.7937(15) 0.029(3) Uani 1 1 d . . .
H1A H 0.8868 0.4800 0.7949 0.044 Uiso 1 1 calc R . .
H1B H 0.6803 0.4765 0.6893 0.044 Uiso 1 1 calc R . .
H1C H 0.7533 0.4387 0.8652 0.044 Uiso 1 1 calc R . .
C2 C 0.6073(13) 0.6591(10) 0.7668(13) 0.022(3) Uani 1 1 d . . .
C3 C 0.8748(15) 0.6478(14) 0.9673(15) 0.034(3) Uani 1 1 d . . .
H3 H 0.9864 0.6220 1.0363 0.041 Uiso 1 1 calc R . .
C4 C 0.8025(15) 0.7417(11) 0.9716(15) 0.029(3) Uani 1 1 d . . .
H4 H 0.8563 0.7955 1.0461 0.035 Uiso 1 1 calc R . .
C5 C 0.5313(15) 0.8432(10) 0.8252(16) 0.024(3) Uani 1 1 d . . .
H5 H 0.5719 0.8877 0.9206 0.028 Uiso 1 1 calc R . .
C6 C 0.5357(17) 0.9108(10) 0.6886(16) 0.030(3) Uani 1 1 d . . .
H6A H 0.6281 0.9660 0.7271 0.036 Uiso 1 1 calc R . .
H6B H 0.5588 0.8652 0.6140 0.036 Uiso 1 1 calc R . .
C7 C 0.2462(15) 0.8754(9) 0.6152(15) 0.019(3) Uani 1 1 d . . .
H7 H 0.2218 0.8246 0.5280 0.023 Uiso 1 1 calc R . .
C8 C 0.3408(17) 0.8251(10) 0.7690(17) 0.029(3) Uani 1 1 d . . .
H8 H 0.3188 0.7470 0.7578 0.035 Uiso 1 1 calc R . .
C9 C 0.1362(16) 0.9467(9) 0.7917(14) 0.023(3) Uani 1 1 d . . .
H9A H 0.1894 1.0182 0.8176 0.028 Uiso 1 1 calc R . .
H9B H 0.0347 0.9429 0.8204 0.028 Uiso 1 1 calc R . .
C10 C 0.0777(15) 0.9236(9) 0.6180(14) 0.020(2) Uani 1 1 d . . .
H10 H 0.0474 0.9913 0.5578 0.024 Uiso 1 1 calc R . .
C11 C -0.0746(17) 0.7526(10) 0.6216(15) 0.025(3) Uani 1 1 d . . .
H11 H 0.0007 0.7297 0.7223 0.030 Uiso 1 1 calc R . .
C12 C -0.1938(17) 0.8526(10) 0.4096(15) 0.024(3) Uani 1 1 d . . .
C13 C -0.2091(16) 0.6979(10) 0.5173(15) 0.024(3) Uani 1 1 d . . .
H13 H -0.2466 0.6288 0.5301 0.029 Uiso 1 1 calc R . .
C14 C -0.4329(17) 0.7291(11) 0.2514(16) 0.031(3) Uani 1 1 d . . .
H14A H -0.5279 0.7051 0.2794 0.047 Uiso 1 1 calc R . .
H14B H -0.3994 0.6714 0.1997 0.047 Uiso 1 1 calc R . .
H14C H -0.4731 0.7901 0.1818 0.047 Uiso 1 1 calc R . .
N1 N 0.7518(13) 0.5960(8) 0.8402(11) 0.024(2) Uani 1 1 d U . .
N2 N 0.6416(13) 0.7487(8) 0.8544(12) 0.022(2) Uani 1 1 d . . .
N3 N -0.0668(14) 0.8482(8) 0.5543(12) 0.023(2) Uani 1 1 d . . .
N4 N -0.2812(14) 0.7600(8) 0.3906(12) 0.022(2) Uani 1 1 d . . .
O1 O 0.2622(13) 0.8670(8) 0.8700(11) 0.029(2) Uani 1 1 d . . .
O2 O 0.3657(11) 0.9580(8) 0.6186(9) 0.0257(19) Uani 1 1 d . . .
Au1 Au 0.40051(5) 0.63233(4) 0.57341(5) 0.02237(13) Uani 1 1 d . . .
Au2 Au -0.23497(6) 0.96527(4) 0.25428(5) 0.02227(13) Uani 1 1 d . . .
Cl1 Cl 0.1655(4) 0.6290(4) 0.3407(3) 0.0324(6) Uani 1 1 d . . .
Cl2 Cl -0.2757(4) 1.0812(3) 0.0578(4) 0.0288(7) Uani 1 1 d . . .
 
loop_
 _atom_site_aniso_label
 _atom_site_aniso_U_11
 _atom_site_aniso_U_22
 _atom_site_aniso_U_33
 _atom_site_aniso_U_23
 _atom_site_aniso_U_13
 _atom_site_aniso_U_12
C1 0.039(7) 0.024(7) 0.024(6) 0.001(5) 0.013(6) 0.007(5)
C2 0.003(4) 0.042(8) 0.017(5) 0.002(5) -0.001(4) -0.002(4)
C3 0.013(5) 0.054(10) 0.028(6) 0.006(7) 0.001(5) 0.002(6)
C4 0.013(6) 0.037(7) 0.026(7) -0.005(6) -0.004(5) -0.001(5)
C5 0.015(6) 0.025(6) 0.028(7) 0.006(5) 0.007(5) 0.008(5)
C6 0.029(7) 0.019(6) 0.037(8) 0.019(6) 0.008(6) 0.006(5)
C7 0.017(6) 0.014(6) 0.027(6) -0.007(5) 0.009(5) -0.008(4)
C8 0.019(6) 0.023(7) 0.044(8) 0.017(6) 0.010(6) -0.003(5)
C9 0.028(6) 0.023(7) 0.027(6) -0.004(5) 0.019(5) 0.006(5)
C10 0.022(6) 0.020(5) 0.022(6) 0.004(5) 0.012(5) 0.002(5)
C11 0.023(6) 0.028(7) 0.025(6) 0.017(6) 0.010(5) 0.009(5)
C12 0.029(7) 0.025(7) 0.022(6) 0.005(5) 0.015(5) 0.007(5)
C13 0.020(6) 0.023(6) 0.030(7) 0.002(5) 0.011(5) 0.005(5)
C14 0.024(7) 0.028(7) 0.034(8) -0.005(6) 0.004(6) -0.008(5)
N1 0.021(5) 0.035(6) 0.010(4) 0.004(4) 0.000(4) 0.006(4)
N2 0.024(5) 0.020(5) 0.022(5) -0.001(4) 0.010(4) -0.007(4)
N3 0.029(6) 0.022(5) 0.024(6) -0.002(4) 0.017(5) 0.000(4)
N4 0.028(6) 0.018(5) 0.028(6) 0.003(4) 0.018(5) -0.001(4)
O1 0.040(6) 0.028(5) 0.022(5) 0.006(4) 0.018(4) 0.007(4)
O2 0.033(5) 0.022(4) 0.018(4) 0.009(4) 0.006(3) -0.003(4)
Au1 0.0200(2) 0.0240(2) 0.0216(2) -0.0033(2) 0.00691(18) -0.0016(2)
Au2 0.0244(3) 0.0206(2) 0.0204(2) 0.0002(2) 0.00765(19) -0.0001(2)
Cl1 0.0282(14) 0.0372(15) 0.0231(13) -0.0061(17) 0.0016(11) -0.0064(16)
Cl2 0.0379(18) 0.0236(15) 0.0255(15) 0.0021(13) 0.0134(14) -0.0026(13)
 
_geom_special_details
;
 All esds (except the esd in the dihedral angle between two l.s. planes)
 are estimated using the full covariance matrix.  The cell esds are taken
 into account individually in the estimation of esds in distances, angles
 and torsion angles; correlations between esds in cell parameters are only
 used when they are defined by crystal symmetry.  An approximate (isotropic)
 treatment of cell esds is used for estimating esds involving l.s. planes.
;
 
loop_
 _geom_bond_atom_site_label_1
 _geom_bond_atom_site_label_2
 _geom_bond_distance
 _geom_bond_site_symmetry_2
 _geom_bond_publ_flag
C1 N1 1.443(16) . ?
C1 H1A 0.9800 . ?
C1 H1B 0.9800 . ?
C1 H1C 0.9800 . ?
C2 N2 1.362(16) . ?
C2 N1 1.372(14) . ?
C2 Au1 1.969(10) . ?
C3 C4 1.34(2) . ?
C3 N1 1.387(17) . ?
C3 H3 0.9500 . ?
C4 N2 1.352(15) . ?
C4 H4 0.9500 . ?
C5 N2 1.459(15) . ?
C5 C8 1.471(17) . ?
C5 C6 1.566(18) . ?
C5 H5 1.0000 . ?
C6 O2 1.426(15) . ?
C6 H6A 0.9900 . ?
C6 H6B 0.9900 . ?
C7 O2 1.432(14) . ?
C7 C8 1.489(18) . ?
C7 C10 1.540(16) . ?
C7 H7 1.0000 . ?
C8 O1 1.462(18) . ?
C8 H8 1.0000 . ?
C9 O1 1.424(15) . ?
C9 C10 1.545(17) . ?
C9 H9A 0.9900 . ?
C9 H9B 0.9900 . ?
C10 N3 1.457(16) . ?
C10 H10 1.0000 . ?
C11 C13 1.344(18) . ?
C11 N3 1.378(15) . ?
C11 H11 0.9500 . ?
C12 N4 1.349(17) . ?
C12 N3 1.351(17) . ?
C12 Au2 1.974(13) . ?
C13 N4 1.353(16) . ?
C13 H13 0.9500 . ?
C14 N4 1.460(16) . ?
C14 H14A 0.9800 . ?
C14 H14B 0.9800 . ?
C14 H14C 0.9800 . ?
Au1 Cl1 2.278(3) . ?
Au1 Au2 3.2948(7) 2_546 ?
Au2 Cl2 2.285(3) . ?
Au2 Au1 3.2948(7) 2_556 ?
 
loop_
 _geom_angle_atom_site_label_1
 _geom_angle_atom_site_label_2
 _geom_angle_atom_site_label_3
 _geom_angle
 _geom_angle_site_symmetry_1
 _geom_angle_site_symmetry_3
 _geom_angle_publ_flag
N1 C1 H1A 109.5 . . ?
N1 C1 H1B 109.5 . . ?
H1A C1 H1B 109.5 . . ?
N1 C1 H1C 109.5 . . ?
H1A C1 H1C 109.5 . . ?
H1B C1 H1C 109.5 . . ?
N2 C2 N1 104.4(9) . . ?
N2 C2 Au1 126.7(8) . . ?
N1 C2 Au1 128.8(9) . . ?
C4 C3 N1 105.2(11) . . ?
C4 C3 H3 127.4 . . ?
N1 C3 H3 127.4 . . ?
C3 C4 N2 109.9(12) . . ?
C3 C4 H4 125.0 . . ?
N2 C4 H4 125.0 . . ?
N2 C5 C8 116.5(11) . . ?
N2 C5 C6 112.1(10) . . ?
C8 C5 C6 99.8(10) . . ?
N2 C5 H5 109.4 . . ?
C8 C5 H5 109.4 . . ?
C6 C5 H5 109.4 . . ?
O2 C6 C5 105.0(10) . . ?
O2 C6 H6A 110.7 . . ?
C5 C6 H6A 110.7 . . ?
O2 C6 H6B 110.7 . . ?
C5 C6 H6B 110.7 . . ?
H6A C6 H6B 108.8 . . ?
O2 C7 C8 101.7(9) . . ?
O2 C7 C10 110.1(10) . . ?
C8 C7 C10 105.8(10) . . ?
O2 C7 H7 112.8 . . ?
C8 C7 H7 112.8 . . ?
C10 C7 H7 112.8 . . ?
O1 C8 C5 114.3(12) . . ?
O1 C8 C7 106.9(10) . . ?
C5 C8 C7 110.6(10) . . ?
O1 C8 H8 108.3 . . ?
C5 C8 H8 108.3 . . ?
C7 C8 H8 108.3 . . ?
O1 C9 C10 105.6(9) . . ?
O1 C9 H9A 110.6 . . ?
C10 C9 H9A 110.6 . . ?
O1 C9 H9B 110.6 . . ?
C10 C9 H9B 110.6 . . ?
H9A C9 H9B 108.7 . . ?
N3 C10 C7 109.9(10) . . ?
N3 C10 C9 114.5(10) . . ?
C7 C10 C9 101.5(9) . . ?
N3 C10 H10 110.2 . . ?
C7 C10 H10 110.2 . . ?
C9 C10 H10 110.2 . . ?
C13 C11 N3 106.8(11) . . ?
C13 C11 H11 126.6 . . ?
N3 C11 H11 126.6 . . ?
N4 C12 N3 104.8(11) . . ?
N4 C12 Au2 127.1(10) . . ?
N3 C12 Au2 128.0(10) . . ?
C11 C13 N4 107.1(11) . . ?
C11 C13 H13 126.5 . . ?
N4 C13 H13 126.5 . . ?
N4 C14 H14A 109.5 . . ?
N4 C14 H14B 109.5 . . ?
H14A C14 H14B 109.5 . . ?
N4 C14 H14C 109.5 . . ?
H14A C14 H14C 109.5 . . ?
H14B C14 H14C 109.5 . . ?
C2 N1 C3 110.7(11) . . ?
C2 N1 C1 124.3(10) . . ?
C3 N1 C1 125.0(11) . . ?
C4 N2 C2 109.8(10) . . ?
C4 N2 C5 123.1(11) . . ?
C2 N2 C5 126.9(10) . . ?
C12 N3 C11 110.0(11) . . ?
C12 N3 C10 124.5(11) . . ?
C11 N3 C10 124.4(10) . . ?
C12 N4 C13 111.2(11) . . ?
C12 N4 C14 124.9(11) . . ?
C13 N4 C14 123.9(10) . . ?
C9 O1 C8 110.1(9) . . ?
C6 O2 C7 104.9(9) . . ?
C2 Au1 Cl1 170.8(4) . . ?
C2 Au1 Au2 91.7(3) . 2_546 ?
Cl1 Au1 Au2 95.85(10) . 2_546 ?
C12 Au2 Cl2 173.4(4) . . ?
C12 Au2 Au1 93.9(4) . 2_556 ?
Cl2 Au2 Au1 92.54(9) . 2_556 ?
 
_chemical_absolute_configuration rm
_diffrn_measured_fraction_theta_max    0.989
_diffrn_reflns_theta_full              27.47
_diffrn_measured_fraction_theta_full   0.989
_refine_diff_density_max    1.848
_refine_diff_density_min   -1.292
_refine_diff_density_rms    0.283
